# Supplementary material for: Comparative genomic, transcriptomic and secretomic profiling of Penicillium oxalicum HP7-1 and its cellulase and xylanase hyper-producing mutant EU2106, and identification of two novel regulatory genes of cellulase and xylanase gene expression
Source: PubMed Central journal article supplement (PMC5035457; doi:10.1186/s13068-016-0616-9), 2016-09-23
Supplement: 13068_2016_616_MOESM2_ESM.pdf [file 13068_2016_616_MOESM2_ESM.pdf]

**Additional file 2: Table S1. List of 274 single nucleotide variations (SNVs) and 12 Insertion/deletions (InDels) that occurred in *P. oxalicum* mutant strain EU2106 compared with the wild-type strain HP7-1.**

|                       | Gene ID                                                 | Functional annotation                       | Predicted transcription factor                          | CWDE                         | CAZy family     | Mutation | Nucleoside position | Amino acid position | Amino acid mutation |
|-----------------------|---------------------------------------------------------|---------------------------------------------|---------------------------------------------------------|------------------------------|-----------------|----------|---------------------|---------------------|---------------------|
| SNVs                  |                                                         |                                             |                                                         |                              |                 |          |                     |                     |                     |
| SNVs in CDSs          |                                                         |                                             |                                                         |                              |                 |          |                     |                     |                     |
| <b>Non-synonymous</b> | POX00008                                                | exo-alpha-L-1, 5-arabinanase                | NA                                                      | Exo-alpha-L-1, 5-arabinanase | GH33; GH93      | C<->T    | 670                 | 224                 | L<->F               |
|                       | POX00193                                                | hypothetical protein                        | NA                                                      | NA                           | NA              | C<->T    | 500                 | 167                 | S<->L               |
|                       | POX00363                                                | hypothetical protein                        | NA                                                      | NA                           | NA              | G<->A    | 1193                | 398                 | G<->E               |
|                       | POX00764                                                | hypothetical protein                        | NA                                                      | NA                           | NA              | C<->T    | 868                 | 290                 | P<->S               |
|                       | POX01100                                                | hypothetical protein                        | NA                                                      | NA                           | NA              | G<->A    | 5225                | 1742                | G<->D               |
|                       | POX01430                                                | hypothetical protein                        | NA                                                      | NA                           | NA              | G<->A    | 4693                | 1565                | A<->T               |
|                       | POX01441                                                | hypothetical protein                        | NA                                                      | NA                           | NA              | G<->A    | 331                 | 111                 | A<->T               |
|                       | POX01462                                                | hypothetical protein                        | NA                                                      | NA                           | NA              | G<->A    | 1597                | 533                 | D<->N               |
|                       | POX01583                                                | hypothetical protein                        | NA                                                      | NA                           | NA              | G<->A    | 853                 | 285                 | V<->I               |
|                       | POX01960                                                | cellulolytic transcriptional activator ClrB | Zn2Cys6: transcriptional regulatory protein, N-terminal | NA                           | NA              | G<->A    | 2174                | 725                 | S<->N               |
|                       | POX02233                                                | hypothetical protein                        | NA                                                      | NA                           | NA              | G<->A    | 887                 | 296                 | E<->K               |
|                       | POX02289                                                | hypothetical protein                        | NA                                                      | NA                           | NA              | G<->A    | 377                 | 126                 | E<->K               |
|                       | POX02603                                                | hypothetical protein                        | NA                                                      | NA                           | NA              | C<->T    | 1066                | 356                 | T<->I               |
|                       | POX02808                                                | hypothetical protein                        | NA                                                      | NA                           | NA              | G<->A    | 421                 | 141                 | G<->R               |
|                       | POX02823                                                | hypothetical protein                        | NA                                                      | NA                           | NA              | G<->A    | 1823                | 608                 | R<->K               |
|                       | POX03102                                                | hypothetical protein                        | NA                                                      | NA                           | NA              | G<->A    | 580                 | 194                 | A<->T               |
| POX03177              | putative dolichyl-phosphate beta-D-mannosyl transferase | NA                                          | NA                                                      | NA                           | GT27; GT2; GT81 | C<->T    | 199                 | 67                  | H<->Y               |

|  |          |                            |                                     |    |         |       |      |     |        |
|--|----------|----------------------------|-------------------------------------|----|---------|-------|------|-----|--------|
|  | POX03199 | hypothetical protein       | CCR4-Not complex component,<br>Not1 | NA | NA      | G<->A | 2594 | 865 | R<->H  |
|  | POX03365 | hypothetical protein       | NA                                  | NA | NA      | G<->A | 1575 | 525 | /M<->I |
|  | POX03807 | hypothetical protein       | NA                                  | NA | NA      | G<->A | 283  | 95  | G<->R  |
|  | POX03862 | hypothetical protein       | NA                                  | NA | NA      | A<->G | 902  | 301 | K<->R  |
|  | POX03974 | hypothetical protein       | NA                                  | NA | NA      | G<->A | 490  | 164 | V<->I  |
|  | POX04097 | hypothetical protein       | NA                                  | NA | NA      | G<->A | 325  | 109 | V<->M  |
|  | POX04237 | hypothetical protein       | NA                                  | NA | NA      | C<->T | 1594 | 532 | L<->F  |
|  | POX04271 | hypothetical protein       | NA                                  | NA | NA      | C<->T | 185  | 62  | S<->F  |
|  | POX04288 | hypothetical protein       | NA                                  | NA | NA      | C<->T | 104  | 35  | T<->M  |
|  | POX04324 | hypothetical protein       | NA                                  | NA | NA      | C<->G | 199  | 67  | P<->A  |
|  | POX04473 | hypothetical protein       | NA                                  | NA | NA      | G<->A | 1949 | 650 | G<->D  |
|  | POX04606 | hypothetical protein       | NA                                  | NA | NA      | C<->T | 1040 | 347 | T<->M  |
|  | POX04630 | hypothetical protein       | NA                                  | NA | NA      | G<->A | 748  | 250 | E<->K  |
|  | POX04690 | hypothetical protein       | NA                                  | NA | NA      | T<->C | 797  | 266 | F<->S  |
|  | POX04745 | hypothetical protein       | NA                                  | NA | NA      | G<->A | 952  | 318 | V<->M  |
|  | POX04773 | hypothetical protein       | NA                                  | NA | NA      | G<->A | 625  | 209 | D<->N  |
|  | POX04876 | hypothetical protein       | NA                                  | NA | NA      | C<->G | 41   | 14  | T<->S  |
|  | POX05415 | hypothetical protein       | NA                                  | NA | NA      | G<->A | 1252 | 418 | D<->N  |
|  | POX05477 | hypothetical protein       | NA                                  | NA | NA      | C<->G | 2964 | 988 | D<->E  |
|  | POX05543 | hypothetical protein       | NA                                  | NA | NA      | G<->A | 872  | 291 | G<->D  |
|  | POX05699 | hypothetical protein       | NA                                  | NA | AA3;AA8 | G<->A | 878  | 293 | C<->Y  |
|  | POX06062 | hypothetical protein       | NA                                  | NA | NA      | G<->A | 166  | 56  | D<->N  |
|  | POX06242 | putative alpha-glucosidase | NA                                  | NA | GH31    | G<->A | 434  | 145 | R<->K  |
|  | POX06319 | hypothetical protein       | NA                                  | NA | NA      | G<->A | 1270 | 424 | D<->N  |

|          |                                                 |              |    |      |       |       |      |       |
|----------|-------------------------------------------------|--------------|----|------|-------|-------|------|-------|
| POX06497 | G protein complex alpha subunit<br>PGA3         | NA           | NA | NA   | C<->T | 467   | 156  | A<->V |
| POX06692 | hypothetical protein                            | NA           | NA | NA   | C<->A | 1033  | 345  | Q<->K |
| POX06695 | hypothetical protein                            | NA           | NA | NA   | G<->A | 695   | 232  | G<->E |
| POX06751 | putative alpha-glucosidase                      | NA           | NA | GH31 | G<->A | 430   | 144  | V<->I |
| POX06827 | hypothetical protein                            | NA           | NA | NA   | G<->A | 123   | 41   | M<->I |
| POX06916 | hypothetical protein                            | NA           | NA | NA   | G<->A | 304   | 102  | A<->T |
| POX07037 | hypothetical protein                            | NA           | NA | NA   | G<->A | 1813  | 605  | D<->N |
| POX07129 | hypothetical protein                            | NA           | NA | NA   | C<->T | 1747  | 583  | P<->S |
| POX07327 | hypothetical protein                            | NA           | NA | CE10 | G<->A | 106   | 36   | G<->R |
| POX07405 | hypothetical protein                            | NA           | NA | NA   | G<->A | 1363  | 455  | G<->S |
| POX07491 | hypothetical protein                            | NA           | NA | NA   | C<->T | 83    | 28   | P<->L |
| POX07567 | putative UDP-Glc: sterol<br>glucosyltransferase | NA           | NA | GT1  | G<->A | 521   | 174  | G<->E |
| POX07604 | hypothetical protein                            | NA           | NA | NA   | G<->A | 937   | 313  | E<->K |
| POX07624 | hypothetical protein                            | NA           | NA | NA   | G<->A | 1079  | 360  | S<->N |
| POX08039 | putative polysialyl transferase                 | NA           | NA | GT4  | G<->A | 1064  | 355  | G<->E |
| POX08082 | hypothetical protein                            | NA           | NA | NA   | G<->A | 3233  | 1078 | G<->D |
| POX08119 | hypothetical protein                            | NA           | NA | NA   | C<->T | 347   | 116  | T<->M |
| POX08503 | hypothetical protein                            | NA           | NA | NA   | G<->A | 511   | 171  | V<->M |
| POX08522 | hypothetical protein                            | Forkhead box | NA | NA   | C<->T | 1834  | 612  | H<->Y |
| POX08692 | hypothetical protein                            | NA           | NA | NA   | G<->A | 12309 | 4103 | G<->S |
| POX08695 | hypothetical protein                            | NA           | NA | NA   | A<->C | 1388  | 463  | E<->A |
| POX08862 | hypothetical protein                            | NA           | NA | NA   | C<->T | 4277  | 1426 | A<->V |
| POX08954 | carbohydrate binding domain-                    | NA           | NA | NA   | C<->T | 848   | 283  | A<->V |

|                |                      |                      |                                                                |    |       |       |       |      |       |
|----------------|----------------------|----------------------|----------------------------------------------------------------|----|-------|-------|-------|------|-------|
|                |                      | containing protein   |                                                                |    |       |       |       |      |       |
|                | POX09340             | hypothetical protein | NA                                                             | NA | NA    | C<->T | 17023 | 5675 | R<->C |
|                | POX09812             | hypothetical protein | NA                                                             | NA | NA    | A<->G | 185   | 62   | N<->S |
| Premature_stop | POX02087             | hypothetical protein | NA                                                             | NA | NA    | C<->T | 340   | 114  | Q<->* |
|                | POX03561             | hypothetical protein | NA                                                             | NA | NA    | C<->T | 667   | 223  | Q<->* |
|                | POX03683             | hypothetical protein | NA                                                             | NA | NA    | G<->A | 3435  | 1145 | W<->* |
|                | POX07858             | hypothetical protein | NA                                                             | NA | NA    | C<->T | 715   | 239  | R<->* |
| Synonymous     | POX00035             | hypothetical protein | NA                                                             | NA | NA    | G<->A | 333   | 111  | -     |
|                | POX00329             | hypothetical protein | NA                                                             | NA | NA    | G<->A | 1134  | 378  | -     |
|                | POX00524             | hypothetical protein | NA                                                             | NA | NA    | C<->T | 210   | 70   | -     |
|                | POX00930             | hypothetical protein | NA                                                             | NA | NA    | C<->T | 1602  | 534  | -     |
|                | POX01118             | hypothetical protein | Zn2Cys6: Fungal transcriptional regulatory protein, N-terminal | NA | NA    | G<->A | 1179  | 393  | -     |
|                | POX01261             | hypothetical protein | NA                                                             | NA | NA    | G<->A | 1401  | 467  | -     |
|                | POX01662             | hypothetical protein | NA                                                             | NA | NA    | G<->A | 618   | 206  | -     |
|                | POX02080             | hypothetical protein | NA                                                             | NA | NA    | C<->T | 180   | 60   | -     |
|                | POX02101             | hypothetical protein | NA                                                             | NA | NA    | G<->A | 441   | 147  | -     |
|                | POX02188             | hypothetical protein | NA                                                             | NA | NA    | C<->T | 144   | 48   | -     |
|                | POX02545             | hypothetical protein | NA                                                             | NA | NA    | G<->A | 483   | 161  | -     |
|                | POX02610             | hypothetical protein | NA                                                             | NA | NA    | C<->T | 27    | 9    | -     |
|                | POX03225             | hypothetical protein | NA                                                             | NA | NA    | C<->T | 213   | 71   | -     |
|                | POX03546             | hypothetical protein | NA                                                             | NA | NA    | G<->A | 2496  | 832  | -     |
|                | POX04325             | hypothetical protein | NA                                                             | NA | NA    | C<->T | 39    | 13   | -     |
| POX04773       | hypothetical protein | NA                   | NA                                                             | NA | C<->T | 636   | 212   | -    |       |
| POX04805       | hypothetical protein | NA                   | NA                                                             | NA | G<->A | 1686  | 562   | -    |       |

|                        |          |                                             |                                    |                                             |      |       |      |     |   |
|------------------------|----------|---------------------------------------------|------------------------------------|---------------------------------------------|------|-------|------|-----|---|
|                        | POX04995 | beta-xylosidase/alpha-L-arabinofuranosidase | NA                                 | beta-xylosidase/alpha-L-arabinofuranosidase | GH43 | C<->T | 93   | 31  | - |
|                        | POX05436 | hypothetical protein                        | Lambda repressor-like, DNA-binding | NA                                          | NA   | G<->A | 426  | 142 | - |
|                        | POX05512 | hypothetical protein                        | NA                                 | NA                                          | NA   | A<->T | 186  | 62  | - |
|                        | POX05999 | hypothetical protein                        | NA                                 | NA                                          | NA   | C<->T | 1458 | 486 | - |
|                        | POX06350 | putative beta-galactosidase                 | NA                                 | NA                                          | GH35 | A<->C | 465  | 155 | - |
|                        | POX06353 | hypothetical protein                        | NA                                 | NA                                          | NA   | C<->T | 1185 | 395 | - |
|                        | POX06494 | hypothetical protein                        | Winged helix repressor DNA-binding | NA                                          | NA   | G<->A | 2100 | 700 | - |
|                        | POX06710 | hypothetical protein                        | NA                                 | NA                                          | NA   | G<->A | 15   | 5   | - |
|                        | POX06718 | hypothetical protein                        | NA                                 | NA                                          | NA   | C<->T | 522  | 174 | - |
|                        | POX07254 | carbon catabolite repressor                 | C2H2 zinc finger                   | NA                                          | NA   | G<->T | 435  | 145 | - |
|                        | POX07295 | hypothetical protein                        | NA                                 | NA                                          | NA   | G<->A | 321  | 107 | - |
|                        | POX07722 | hypothetical protein                        | NA                                 | NA                                          | NA   | G<->A | 303  | 101 | - |
|                        | POX07767 | hypothetical protein                        | NA                                 | NA                                          | NA   | G<->A | 1089 | 363 | - |
|                        | POX08038 | hypothetical protein                        | NA                                 | NA                                          | NA   | G<->A | 243  | 81  | - |
|                        | POX08039 | putative polysialyltransferase              | NA                                 | NA                                          | GT4  | G<->A | 1053 | 351 | - |
|                        | POX08165 | hypothetical protein                        | NA                                 | NA                                          | NA   | G<->A | 1101 | 367 | - |
|                        | POX09038 | hypothetical protein                        | NA                                 | NA                                          | NA   | G<->A | 438  | 146 | - |
|                        | POX09635 | hypothetical protein                        | NA                                 | NA                                          | NA   | C<->T | 1020 | 340 | - |
| <b>SNVs in Introns</b> |          |                                             |                                    |                                             |      |       |      |     |   |
| <b>Intron</b>          | POX00655 | hypothetical protein                        | NA                                 | NA                                          | NA   | G->A  | 1582 | -   | - |
|                        | POX01016 | hypothetical protein                        | NA                                 | NA                                          | NA   | G->T  | 1816 | -   | - |
|                        | POX01642 | hypothetical protein                        | NA                                 | NA                                          | NA   | G->A  | 600  | -   | - |

|                                 |          |                                                       |                                                                   |    |       |      |      |   |   |
|---------------------------------|----------|-------------------------------------------------------|-------------------------------------------------------------------|----|-------|------|------|---|---|
|                                 | POX02115 | hypothetical protein                                  | NA                                                                | NA | NA    | G->T | 1279 | - | - |
|                                 | POX03021 | putative chitinase                                    | NA                                                                | NA | GH18  | C->T | 702  | - | - |
|                                 | POX04007 | Zinc finger C2H2-type/integrase<br>DNA-binding domain | C2H2 zinc finger                                                  | NA | NA    | G->T | 1478 | - | - |
|                                 | POX04760 | hypothetical protein                                  | NA                                                                | NA | NA    | A->T | 336  | - | - |
|                                 | POX04769 | hypothetical protein                                  | C2H2 zinc finger                                                  | NA | NA    | G->T | 1722 | - | - |
|                                 | POX04950 | hypothetical protein                                  | NA                                                                | NA | NA    | A->T | 411  | - | - |
|                                 | POX05006 | hypothetical protein                                  | Zn2Cys6: Fungal transcriptional<br>regulatory protein, N-terminal | NA | NA    | G->A | 163  | - | - |
|                                 | POX05078 | hypothetical protein                                  | NA                                                                | NA | GH109 | G->A | 1338 | - | - |
|                                 | POX05365 | hypothetical protein                                  | NA                                                                | NA | NA    | G->A | 235  | - | - |
|                                 | POX05598 | hypothetical protein                                  | NA                                                                | NA | NA    | C->T | 447  | - | - |
|                                 | POX05984 | hypothetical protein                                  | NA                                                                | NA | NA    | C->T | 189  | - | - |
|                                 | POX06452 | hypothetical protein                                  | NA                                                                | NA | NA    | G->T | 407  | - | - |
|                                 | POX07733 | hypothetical protein                                  | NA                                                                | NA | NA    | C->T | 448  | - | - |
|                                 | POX08513 | hypothetical protein                                  | NA                                                                | NA | NA    | C->T | 1640 | - | - |
|                                 | POX08588 | hypothetical protein                                  | NA                                                                | NA | NA    | C->T | 257  | - | - |
|                                 | POX09056 | putative alpha-mannosidase                            | NA                                                                | NA | GH47  | C->T | 2044 | - | - |
|                                 | POX09087 | hypothetical protein                                  | NA                                                                | NA | NA    | G->T | 2824 | - | - |
|                                 | POX09087 | hypothetical protein                                  | NA                                                                | NA | NA    | G->A | 2803 | - | - |
|                                 | POX09689 | hypothetical protein                                  | NA                                                                | NA | NA    | G->A | 321  | - | - |
|                                 | POX09689 | hypothetical protein                                  | NA                                                                | NA | NA    | G->A | 125  | - | - |
| <b>SNVs in Intergenic genes</b> |          |                                                       |                                                                   |    |       |      |      |   |   |
| <b>1500-bp<br/>upstream of</b>  | POX00189 | hypothetical protein                                  | NA                                                                | NA | NA    | G->A | +30  | - | - |
|                                 | POX00241 | hypothetical protein                                  | C2H2 zinc finger                                                  | NA | NA    | C->T | +38  | - | - |

|            |                      |                                                          |                                                        |    |          |       |       |   |   |
|------------|----------------------|----------------------------------------------------------|--------------------------------------------------------|----|----------|-------|-------|---|---|
| start code | POX00301             | hypothetical protein                                     | NA                                                     | NA | NA       | G->A  | +87   | - | - |
|            | POX00344             | hypothetical protein                                     | NA                                                     | NA | NA       | C->T  | +3    | - | - |
|            | POX00353             | hypothetical protein                                     | NA                                                     | NA | NA       | G->A  | +8    | - | - |
|            | POX01000             | hypothetical protein                                     | NA                                                     | NA | NA       | G->A  | +1141 | - | - |
|            | POX01035             | hypothetical protein                                     | NA                                                     | NA | NA       | A->T  | +589  | - | - |
|            | POX01042             | hypothetical protein                                     | NA                                                     | NA | NA       | G->C  | +638  | - | - |
|            | POX01126             | hypothetical protein                                     | NA                                                     | NA | NA       | G->T  | +742  | - | - |
|            | POX01135             | hypothetical protein                                     | Winged helix repressor DNA-binding                     | NA | NA       | C->T  | +360  | - | - |
|            | POX01264             | hypothetical protein                                     | NA                                                     | NA | NA       | G->A  | +182  | - | - |
|            | POX01411             | hypothetical protein                                     | NA                                                     | NA | NA       | C->A  | +1233 | - | - |
|            | POX01440             | hypothetical protein                                     | NA                                                     | NA | NA       | C->T  | +76   | - | - |
|            | POX01469             | hypothetical protein                                     | NA                                                     | NA | NA       | G->A  | +266  | - | - |
|            | POX01631             | hypothetical protein                                     | NA                                                     | NA | NA       | G->C  | +30   | - | - |
|            | POX01770             | hypothetical protein                                     | NA                                                     | NA | NA       | G->A  | +196  | - | - |
|            | POX01829             | hypothetical protein                                     | NA                                                     | NA | NA       | G->T  | +1110 | - | - |
|            | POX02060             | hypothetical protein                                     | NA                                                     | NA | NA       | G->A  | +69   | - | - |
|            | POX02101             | hypothetical protein                                     | NA                                                     | NA | NA       | C->T  | +111  | - | - |
|            | POX02489             | hypothetical protein                                     | NA                                                     | NA | NA       | G->A  | +125  | - | - |
|            | POX02524             | putative UDP-Glc: glycoprotein alpha-glucosyltransferase | NA                                                     | NA | GT24;GT8 | G->T  | +31   | - | - |
|            | POX02540             | hypothetical protein                                     | bZIP: Basic-leucine zipper (bZIP) transcription factor | NA | NA       | C->T  | +377  | - | - |
| POX02647   | hypothetical protein | NA                                                       | NA                                                     | NA | C->T     | +1054 | -     | - |   |
| POX02742   | hypothetical protein | NA                                                       | NA                                                     | NA | C->T     | +40   | -     | - |   |

|          |                      |                                                                |    |    |      |       |   |   |
|----------|----------------------|----------------------------------------------------------------|----|----|------|-------|---|---|
| POX02758 | hypothetical protein | NA                                                             | NA | NA | G->A | +224  | - | - |
| POX02798 | hypothetical protein | NA                                                             | NA | NA | C->T | +241  | - | - |
| POX03586 | hypothetical protein | Zn2Cys6: Fungal transcriptional regulatory protein, N-terminal | NA | NA | C->T | +798  | - | - |
| POX03920 | hypothetical protein | NA                                                             | NA | NA | G->A | +380  | - | - |
| POX03999 | hypothetical protein | Zn2Cys6: Fungal transcriptional regulatory protein, N-terminal | NA | NA | C->T | +1375 | - | - |
| POX04009 | hypothetical protein | NA                                                             | NA | NA | G->T | +1139 | - | - |
| POX04573 | hypothetical protein | NA                                                             | NA | NA | A->G | +23   | - | - |
| POX04595 | hypothetical protein | YL1 nuclear protein                                            | NA | NA | G->A | +51   | - | - |
| POX04640 | hypothetical protein | NA                                                             | NA | NA | G->A | +128  | - | - |
| POX04658 | hypothetical protein | NA                                                             | NA | NA | C->T | +736  | - | - |
| POX04693 | hypothetical protein | NA                                                             | NA | NA | A->C | +52   | - | - |
| POX05197 | hypothetical protein | NA                                                             | NA | NA | G->A | +1005 | - | - |
| POX05320 | hypothetical protein | NA                                                             | NA | NA | G->A | +681  | - | - |
| POX05369 | hypothetical protein | NA                                                             | NA | NA | G->A | +98   | - | - |
| POX05643 | hypothetical protein | NA                                                             | NA | NA | T->G | +682  | - | - |
| POX05696 | hypothetical protein | NA                                                             | NA | NA | C->T | +409  | - | - |
| POX06007 | hypothetical protein | NA                                                             | NA | NA | C->T | +923  | - | - |
| POX06041 | hypothetical protein | NA                                                             | NA | NA | C->T | +164  | - | - |
| POX06094 | hypothetical protein | NA                                                             | NA | NA | G->T | +213  | - | - |
| POX06219 | hypothetical protein | NA                                                             | NA | NA | C->T | +282  | - | - |
| POX06779 | hypothetical protein | NA                                                             | NA | NA | G->T | +7    | - | - |
| POX06820 | hypothetical protein | NA                                                             | NA | NA | G->T | +31   | - | - |
| POX07186 | hypothetical protein | NA                                                             | NA | NA | G->A | +888  | - | - |



|                                            |          |                                               |                                                                |                                                                |      |      |      |   |   |
|--------------------------------------------|----------|-----------------------------------------------|----------------------------------------------------------------|----------------------------------------------------------------|------|------|------|---|---|
|                                            | POX07253 | hypothetical protein                          | NA                                                             | NA                                                             | NA   | C->A | +156 | - | - |
|                                            | POX07541 | hypothetical protein                          | NA                                                             | NA                                                             | NA   | C->T | +435 | - | - |
|                                            | POX07547 | hypothetical protein                          | NA                                                             | NA                                                             | NA   | G->T | +96  | - | - |
|                                            | POX07777 | hypothetical protein                          | NA                                                             | NA                                                             | NA   | G->A | +332 | - | - |
|                                            | POX08476 | putative rhamnogalacturonan acetyltransferase | NA                                                             | Pectin acetyltransferase; rhamnogalacturonan acetyltransferase | CE12 | G->T | +599 | - | - |
|                                            | POX08835 | hypothetical protein                          | NA                                                             | NA                                                             | NA   | G->A | +521 | - | - |
|                                            | POX09251 | hypothetical protein                          | NA                                                             | NA                                                             | NA   | G->A | +490 | - | - |
|                                            | POX09827 | hypothetical protein                          | NA                                                             | NA                                                             | NA   | C->G | +849 | - | - |
| <b>200-bp downstream of terminal codes</b> | POX00316 | hypothetical protein                          | NA                                                             | NA                                                             | NA   | G->A | -165 | - | - |
|                                            | POX02696 | hypothetical protein                          | NA                                                             | NA                                                             | NA   | C->G | -171 | - | - |
|                                            | POX02766 | hypothetical protein                          | Zn2Cys6: Fungal transcriptional regulatory protein, N-terminal | NA                                                             | NA   | G->A | -83  | - | - |
|                                            | POX03118 | hypothetical protein                          | NA                                                             | NA                                                             | NA   | G->A | -127 | - | - |
|                                            | POX03204 | hypothetical protein                          | NA                                                             | NA                                                             | NA   | G->A | -40  | - | - |
|                                            | POX03328 | hypothetical protein                          | NA                                                             | NA                                                             | NA   | G->T | -18  | - | - |
|                                            | POX04322 | hypothetical protein                          | NA                                                             | NA                                                             | NA   | C->T | -29  | - | - |
|                                            | POX04791 | hypothetical protein                          | NA                                                             | NA                                                             | NA   | G->A | -79  | - | - |
|                                            | POX05545 | hypothetical protein                          | NA                                                             | NA                                                             | NA   | G->T | -91  | - | - |
|                                            | POX06196 | hypothetical protein                          | NA                                                             | NA                                                             | AA1  | T->G | -141 | - | - |
|                                            | POX06244 | hypothetical protein                          | NA                                                             | NA                                                             | NA   | G->A | -120 | - | - |
|                                            | POX06605 | hypothetical protein                          | NA                                                             | NA                                                             | NA   | C->T | -162 | - | - |
|                                            | POX07209 | hypothetical protein                          | NA                                                             | NA                                                             | NA   | C->T | -44  | - | - |
|                                            | POX07172 | hypothetical protein                          | NA                                                             | NA                                                             | NA   | A->G | -28  | - | - |

|               |                      |                      |    |                                             |          |      |       |   |   |
|---------------|----------------------|----------------------|----|---------------------------------------------|----------|------|-------|---|---|
|               | POX07291             | hypothetical protein | NA | NA                                          | NA       | G->A | -45   | - | - |
|               | POX07678             | hypothetical protein | NA | NA                                          | NA       | C->T | -124  | - | - |
| <b>Others</b> | POX00007             | beta-xylosidase      | NA | beta-xylosidase/alpha-L-arabinofuranosidase | GH3; AA5 | G->A | -562  | - | - |
|               | POX00011             | hypothetical protein | NA | NA                                          | NA       | A->C | -997  | - | - |
|               | POX00424             | hypothetical protein | NA | NA                                          | NA       | G->A | -1144 | - | - |
|               | POX00478             | hypothetical protein | NA | NA                                          | NA       | G->A | -769  | - | - |
|               | POX00811             | hypothetical protein | NA | NA                                          | NA       | C->T | -395  | - | - |
|               | POX00937             | hypothetical protein | NA | NA                                          | NA       | C->T | +1735 | - | - |
|               | POX01380             | hypothetical protein | NA | NA                                          | NA       | C->T | -510  | - | - |
|               | POX01599             | hypothetical protein | NA | NA                                          | NA       | G->A | -148  | - | - |
|               | POX01754             | hypothetical protein | NA | NA                                          | NA       | G->A | -308  | - | - |
|               | POX01834             | hypothetical protein | NA | NA                                          | NA       | G->A | -1040 | - | - |
|               | POX02108             | hypothetical protein | NA | NA                                          | NA       | G->A | -1891 | - | - |
|               | POX02134             | hypothetical protein | NA | NA                                          | NA       | T->A | -6374 | - | - |
|               | POX02246             | hypothetical protein | NA | NA                                          | NA       | G->A | -448  | - | - |
|               | POX02451             | hypothetical protein | NA | NA                                          | NA       | A->G | -3660 | - | - |
|               | POX02527             | hypothetical protein | NA | NA                                          | NA       | G->A | +1782 | - | - |
|               | POX02583             | hypothetical protein | NA | NA                                          | NA       | C->T | -261  | - | - |
|               | POX02586             | hypothetical protein | NA | NA                                          | NA       | G->T | -353  | - | - |
|               | POX02589             | hypothetical protein | NA | NA                                          | NA       | G->T | -1030 | - | - |
|               | POX02942             | hypothetical protein | NA | NA                                          | NA       | G->A | -349  | - | - |
|               | POX03078             | hypothetical protein | NA | NA                                          | NA       | G->A | -1504 | - | - |
| POX03207      | hypothetical protein | NA                   | NA | NA                                          | G->T     | -683 | -     | - |   |
| POX03211      | hypothetical protein | NA                   | NA | NA                                          | G->A     | -618 | -     | - |   |

|          |                                                |                                                                |    |    |      |        |   |   |
|----------|------------------------------------------------|----------------------------------------------------------------|----|----|------|--------|---|---|
| POX03731 | hypothetical protein                           | NA                                                             | NA | NA | C->A | -624   | - | - |
| POX03783 | hypothetical protein                           | NA                                                             | NA | NA | C->T | -389   | - | - |
| POX03876 | hypothetical protein                           | NA                                                             | NA | NA | T->C | -41599 | - | - |
| POX03876 | hypothetical protein                           | NA                                                             | NA | NA | C->T | -1650  | - | - |
| POX03997 | hypothetical protein                           | NA                                                             | NA | NA | C->A | -1320  | - | - |
| POX03998 | hypothetical protein                           | NA                                                             | NA | NA | G->A | +1522  | - | - |
| POX04025 | hypothetical protein                           | NA                                                             | NA | NA | G->C | +1712  | - | - |
| POX04036 | hypothetical protein                           | NA                                                             | NA | NA | G->A | -1552  | - | - |
| POX04146 | hypothetical protein                           | NA                                                             | NA | NA | G->A | -334   | - | - |
| POX04532 | carbohydrate binding domain-containing protein | NA                                                             | NA | NA | C->T | -818   | - | - |
| POX04697 | hypothetical protein                           | NA                                                             | NA | NA | G->C | -489   | - | - |
| POX04701 | hypothetical protein                           | Zn2Cys6: Fungal transcriptional regulatory protein, N-terminal | NA | NA | G->A | +2261  | - | - |
| POX04880 | hypothetical protein                           | NA                                                             | NA | NA | C->T | -991   | - | - |
| POX04908 | hypothetical protein                           | NA                                                             | NA | NA | G->T | -224   | - | - |
| POX04956 | hypothetical protein                           | NA                                                             | NA | NA | G->A | -203   | - | - |
| POX05036 | hypothetical protein                           | NA                                                             | NA | NA | C->T | -1193  | - | - |
| POX05410 | hypothetical protein                           | NA                                                             | NA | NA | G->A | -3033  | - | - |
| POX05516 | hypothetical protein                           | NA                                                             | NA | NA | G->A | -349   | - | - |
| POX05758 | hypothetical protein                           | NA                                                             | NA | NA | G->A | -673   | - | - |
| POX05813 | hypothetical protein                           | NA                                                             | NA | NA | G->A | -553   | - | - |
| POX05922 | hypothetical protein                           | NA                                                             | NA | NA | G->T | -239   | - | - |
| POX06015 | hypothetical protein                           | NA                                                             | NA | NA | G->A | -1900  | - | - |
| POX06142 | hypothetical protein                           | NA                                                             | NA | NA | G->A | -1047  | - | - |

|                         |                |                              |                                       |             |                    |                           |                             |                            |   |
|-------------------------|----------------|------------------------------|---------------------------------------|-------------|--------------------|---------------------------|-----------------------------|----------------------------|---|
|                         | POX06224       | hypothetical protein         | NA                                    | NA          | NA                 | G->A                      | +1690                       | -                          | - |
|                         | POX06461       | hypothetical protein         | NA                                    | NA          | NA                 | G->A                      | -1477                       | -                          | - |
|                         | POX06556       | hypothetical protein         | NA                                    | NA          | NA                 | C->T                      | -779                        | -                          | - |
|                         | POX06559       | hypothetical protein         | NA                                    | NA          | NA                 | G->A                      | -246                        | -                          | - |
|                         | POX06663       | hypothetical protein         | NA                                    | NA          | NA                 | C->T                      | -771                        | -                          | - |
|                         | POX06773       | hypothetical protein         | NA                                    | NA          | NA                 | T->C                      | -648                        | -                          | - |
|                         | POX07198       | hypothetical protein         | NA                                    | NA          | NA                 | C->T                      | -342                        | -                          | - |
|                         | POX07212       | hypothetical protein         | NA                                    | NA          | NA                 | G->A                      | -2182                       | -                          | - |
|                         | POX07257       | hypothetical protein         | NA                                    | NA          | NA                 | C->T                      | -570                        | -                          | - |
|                         | POX07253       | hypothetical protein         | NA                                    | NA          | NA                 | A->C                      | -6221                       | -                          | - |
|                         | POX07253       | hypothetical protein         | NA                                    | NA          | NA                 | C->T                      | -7653                       | -                          | - |
|                         | POX07714       | hypothetical protein         | NA                                    | NA          | NA                 | A->T                      | +2005                       | -                          | - |
|                         | POX07758       | hypothetical protein         | NA                                    | NA          | NA                 | G->A                      | -849                        | -                          | - |
|                         | POX07868       | hypothetical protein         | NA                                    | NA          | NA                 | C->T                      | -467                        | -                          | - |
|                         | POX08234       | hypothetical protein         | NA                                    | NA          | NA                 | G->A                      | -453                        | -                          | - |
|                         | POX08278       | hypothetical protein         | NA                                    | NA          | NA                 | C->T                      | -211                        | -                          | - |
|                         | POX08736       | hypothetical protein         | NA                                    | NA          | NA                 | A->C                      | -9233                       | -                          | - |
|                         | POX08872       | hypothetical protein         | NA                                    | NA          | NA                 | G->A                      | -1157                       | -                          | - |
| <b>InDels</b>           |                |                              |                                       |             |                    |                           |                             |                            |   |
|                         | <b>Gene ID</b> | <b>Functional annotation</b> | <b>Predicted transcription factor</b> | <b>CWDE</b> | <b>CAZy family</b> | <b>Insertion/deletion</b> | <b>Mutation nucleotides</b> | <b>Nucleoside position</b> |   |
| <b>CDS</b>              | POX01312       | hypothetical protein         | NA                                    | NA          | NA                 | Deletion                  | C                           | 278                        |   |
| <b>Intron</b>           | POX05376       | hypothetical protein         | NA                                    | NA          | NA                 | Deletion                  | C                           | 289                        |   |
| <b>Intergenic genes</b> | POX09781       | hypothetical protein         | NA                                    | NA          | NA                 | Deletion                  | TAAT                        | +123                       |   |
|                         | POX07939       | hypothetical protein         | NA                                    | NA          | NA                 | Deletion                  | A                           | +1462                      |   |

|  |          |                      |                                                  |    |    |           |       |        |
|--|----------|----------------------|--------------------------------------------------|----|----|-----------|-------|--------|
|  | POX09804 | hypothetical protein | NA                                               | NA | NA | Deletion  | T     | +151   |
|  | POX02071 | hypothetical protein | Zn2Cys6: Fungal specific<br>transcription factor | NA | NA | Deletion  | CG    | -1624  |
|  | POX09745 | hypothetical protein | NA                                               | NA | NA | Deletion  | TAC   | +3971  |
|  | POX07713 | hypothetical protein | NA                                               | NA | NA | Deletion  | A     | +20762 |
|  | POX07713 | hypothetical protein | NA                                               | NA | NA | Insertion | TT    | -7097  |
|  | POX06050 | hypothetical protein | NA                                               | NA | NA | Deletion  | A     | -747   |
|  | POX01922 | hypothetical protein | NA                                               | NA | NA | Deletion  | C     | -843   |
|  | POX08605 | hypothetical protein | NA                                               | NA | NA | Deletion  | GCCAG | -912   |

'+' and '-' respectively represent the upstream of start codon and downstream of stop codon. CDS, coding DNA sequence; CAZy, Carbohydrate-Active Enzymes; GH, Glycoside hydrolase; CE, Carbohydrate esterase; GT, Glycosyl transferase; AA, Auxiliary activities; CWDE, Plant cell wall degrading enzyme
