# Supplementary material for: Comparative genomic, transcriptomic and secretomic profiling of Penicillium oxalicum HP7-1 and its cellulase and xylanase hyper-producing mutant EU2106, and identification of two novel regulatory genes of cellulase and xylanase gene expression
Source: PubMed Central journal article supplement (PMC5035457; doi:10.1186/s13068-016-0616-9), 2016-09-23
Supplement: 13068_2016_616_MOESM3_ESM.pdf [file 13068_2016_616_MOESM3_ESM.pdf]

**Additional file 3: Table S2. List of the 347 genes whose expression was altered in the cellulase hyper-producing mutant *P. oxalicum* strain EU2106 compared with the wild-type strain HP7-1 when cultivated in medium containing wheat bran and Avicel as the carbon source**

| Gene ID  | Function annotation                         | CAZy family | CWDE                    | IPR prediction                                                                          | FPKM in HP7-1 | FPKM in EU2106 | Log2 (EU2106 /HP7-1) | Regulation in EU2106 | Probability |
|----------|---------------------------------------------|-------------|-------------------------|-----------------------------------------------------------------------------------------|---------------|----------------|----------------------|----------------------|-------------|
| POX01796 | beta-1, 4-N-acetylgalactosaminyltransferase | GT25        | NA                      | IPR002654; Glycosyl transferase, family 25                                              | 21.2967       | 113.397        | 2.412678688          | Up                   | 0.849973305 |
| POX06079 | beta-glucosidase                            | GH1         | beta-glucosidase        | IPR001360; Glycoside hydrolase, family 1                                                | 1975.47       | 7435.5         | 1.912230741          | Up                   | 0.878092187 |
| POX03641 | beta-glucosidase                            | GH3         | beta-glucosidase        | IPR001764; Glycoside hydrolase, family 3                                                | 475.083       | 1242.64        | 1.387159769          | Up                   | 0.822975618 |
| POX01961 | beta-mannosidase                            | GH2         | beta-mannosidase        | IPR006102; Glycoside hydrolase, family 2, immunoglobulin-like beta-sandwich             | 280.567       | 772.76         | 1.461676802          | Up                   | 0.829079907 |
| POX02490 | cellobiohydrolase                           | GH7         | cellobiohydrolase       | IPR001722; Glycoside hydrolase, family 7                                                | 101.83        | 566.413        | 2.475692572          | Up                   | 0.898202527 |
| POX06051 | cellodextrin transporter cdt-c              | NA          | NA                      | IPR003663; Sugar/inositol transporter// IPR020846; Major facilitator superfamily domain | 4601.59       | 12781.3        | 1.47383182           | Up                   | 0.836625734 |
| POX05188 | chitin glucanosyltransferase                | GH16        | NA                      | IPR000757; Glycoside hydrolase, family 16                                               | 0.84333       | 52.23          | 5.952631914          | Up                   | 0.851877558 |
| POX07971 | chitinase                                   | GH18        | NA                      | IPR001223; Glycoside hydrolase family 18, catalytic domain                              | 80.0433       | 259.09         | 1.69460018           | Up                   | 0.837515572 |
| POX05570 | endo-beta-1,4-glucanase                     | CBM1; GH45  | endo-beta-1,4-glucanase | IPR000254; Cellulose-binding domain, fungal// IPR000334; Glycoside hydrolase, family 45 | 3359.26       | 8017.75        | 1.255054804          | Up                   | 0.808097526 |
| POX05571 | endo-beta-1,4-glucanase 1                   | CBM1; GH7   | endo-beta-1,4-glucanase | IPR000254; Cellulose-binding domain, fungal// IPR001722; Glycoside hydrolase, family 7  | 1616.75       | 4859.37        | 1.58767069           | Up                   | 0.850631785 |
| POX00065 | hypothetical protein                        | NA          | NA                      | IPR001804; Isocitrate and isopropylmalate dehydrogenases family                         | 52.5933       | 204.217        | 1.957148771          | Up                   | 0.850685175 |
| POX00146 | hypothetical protein                        | NA          | NA                      | IPR001279; Metallo-beta-lactamase                                                       | 61.3467       | 185.573        | 1.596932551          | Up                   | 0.818473038 |
| POX00169 | hypothetical protein                        | NA          | NA                      | IPR018825; Domain of unknown function DUF2427                                           | 65.4767       | 422.57         | 2.690137565          | Up                   | 0.901192383 |
| POX00252 | hypothetical protein                        | NA          | NA                      | IPR006254; Isocitrate lyase                                                             | 115.593       | 545.987        | 2.239807525          | Up                   | 0.888538886 |
| POX00292 | hypothetical protein                        | NA          | NA                      | IPR005631; Flavinator of succinate dehydrogenase                                        | 38.8133       | 128.72         | 1.729611987          | Up                   | 0.816408614 |

|          |                      |    |    |                                                                    |         |         |             |    |             |
|----------|----------------------|----|----|--------------------------------------------------------------------|---------|---------|-------------|----|-------------|
| POX00301 | hypothetical protein | NA | NA | IPR008146; Glutamine synthetase, catalytic domain                  | 286.52  | 1135.43 | 1.986526778 | Up | 0.87933796  |
| POX00441 | hypothetical protein | NA | NA | IPR000146; Fructose-1,6-bisphosphatase class 1                     | 50.47   | 252.923 | 2.325202147 | Up | 0.877237943 |
| POX00445 | hypothetical protein | NA | NA | NA                                                                 | 225.263 | 1394.99 | 2.630566926 | Up | 0.909788219 |
| POX00659 | hypothetical protein | NA | NA | IPR002327; Cytochrome c, class IA/ IB                              | 620.397 | 2073.84 | 1.741041752 | Up | 0.864655633 |
| POX00667 | hypothetical protein | NA | NA | IPR006931; Calcipressin                                            | 65.8767 | 200.633 | 1.606721854 | Up | 0.821605268 |
| POX00769 | hypothetical protein | NA | NA | IPR002872; Proline dehydrogenase domain                            | 23.41   | 92.6567 | 1.984769848 | Up | 0.816550988 |
| POX00805 | hypothetical protein | NA | NA | IPR002680; Alternative oxidase                                     | 73.9    | 368.1   | 2.31645148  | Up | 0.885566827 |
| POX00860 | hypothetical protein | NA | NA | NA                                                                 | 92.07   | 246.95  | 1.423415917 | Up | 0.805178857 |
| POX01067 | hypothetical protein | NA | NA | IPR015767; Rho GTPase activating protein                           | 279.877 | 1066.44 | 1.92993517  | Up | 0.875191315 |
| POX01075 | hypothetical protein | NA | NA | IPR002020; Citrate synthase                                        | 676.687 | 1794.05 | 1.406657551 | Up | 0.826784125 |
| POX01102 | hypothetical protein | NA | NA | IPR002048; EF-hand domain                                          | 30.9033 | 121.69  | 1.977376253 | Up | 0.831393486 |
| POX01238 | hypothetical protein | NA | NA | IPR002085; Alcohol dehydrogenase superfamily, zinc-type            | 1073.32 | 4502.84 | 2.068760498 | Up | 0.887435487 |
| POX01283 | hypothetical protein | NA | NA | IPR006091; Acyl-CoA oxidase/dehydrogenase, central domain          | 178.987 | 653.693 | 1.868761864 | Up | 0.867609895 |
| POX01420 | hypothetical protein | NA | NA | IPR031833; Protein of unknown function DUF4748                     | 122.687 | 332.907 | 1.440139293 | Up | 0.814878092 |
| POX01435 | hypothetical protein | NA | NA | IPR002198; Short-chain dehydrogenase/reductase SDR                 | 18.07   | 81.66   | 2.176033061 | Up | 0.820074746 |
| POX01617 | hypothetical protein | NA | NA | IPR002198; Short-chain dehydrogenase/reductase SDR                 | 36.4467 | 167.293 | 2.198521175 | Up | 0.858302189 |
| POX01660 | hypothetical protein | NA | NA | IPR008030; NmrA-like domain//IPR016040; NAD(P)-binding domain      | 24.6167 | 96.8667 | 1.976364877 | Up | 0.819256095 |
| POX01761 | hypothetical protein | NA | NA | IPR004136; Nitronate monooxygenase                                 | 76.29   | 254.65  | 1.738949849 | Up | 0.841751201 |
| POX01812 | hypothetical protein | NA | NA | IPR011701; Major facilitator superfamily                           | 0.91    | 3334.81 | 11.83944896 | Up | 0.998665243 |
| POX01840 | hypothetical protein | NA | NA | IPR018713; Domain of unknown function DUF2236                      | 224.093 | 605.787 | 1.434710095 | Up | 0.823135789 |
| POX01981 | hypothetical protein | NA | NA | IPR020846; Major facilitator superfamily domain                    | 35.5467 | 142.323 | 2.00138602  | Up | 0.840434241 |
| POX02134 | hypothetical protein | NA | NA | IPR000103; Pyridine nucleotide-disulphide oxidoreductase, class-II | 3.21    | 54.5333 | 4.08649314  | Up | 0.835362164 |
| POX02199 | hypothetical protein | NA | NA | IPR003736; Phenylacetic acid degradation-related domain            | 29.74   | 105.963 | 1.83308858  | Up | 0.814326393 |

|          |                      |    |    |                                                                                              |         |         |             |    |             |
|----------|----------------------|----|----|----------------------------------------------------------------------------------------------|---------|---------|-------------|----|-------------|
| POX02214 | hypothetical protein | NA | NA | IPR006108; 3-hydroxyacyl-CoA dehydrogenase, C-terminal                                       | 66.03   | 211.843 | 1.681804177 | Up | 0.830895177 |
| POX02301 | hypothetical protein | NA | NA | IPR000634; Serine/threonine dehydratase, pyridoxal-phosphate-binding site                    | 16.9667 | 99.5933 | 2.553346018 | Up | 0.848371596 |
| POX02628 | hypothetical protein | NA | NA | IPR001563; Peptidase S10, serine carboxypeptidase                                            | 233.533 | 1329.36 | 2.509031457 | Up | 0.906086492 |
| POX02795 | hypothetical protein | NA | NA | IPR027417; P-loop containing nucleoside triphosphate hydrolase                               | 51.8567 | 204.26  | 1.977805332 | Up | 0.851966542 |
| POX02896 | hypothetical protein | NA | NA | IPR004045; Glutathione S-transferase, N-terminal                                             | 321.293 | 842.98  | 1.391607357 | Up | 0.820982381 |
| POX02962 | hypothetical protein | NA | NA | IPR005995; Phosphoglycerate mutase, 2,3-bisphosphoglycerate-independent                      | 91.9433 | 264.023 | 1.521848559 | Up | 0.821445097 |
| POX03007 | hypothetical protein | NA | NA | IPR018620; Ubiquitin 3 binding protein But2, C-terminal                                      | 19.9567 | 78.9933 | 1.984860132 | Up | 0.806122086 |
| POX03048 | hypothetical protein | NA | NA | IPR011766; Thiamine pyrophosphate enzyme, C-terminal TPP-binding                             | 167.853 | 862.483 | 2.361295391 | Up | 0.897437266 |
| POX03111 | hypothetical protein | NA | NA | IPR007698; Alanine dehydrogenase/pyridine nucleotide transhydrogenase, NAD(H)-binding domain | 40.1933 | 128.713 | 1.679133375 | Up | 0.811977722 |
| POX03113 | hypothetical protein | NA | NA | IPR000771; Ketose-bisphosphate aldolase, class-II                                            | 700.62  | 2280.45 | 1.70261657  | Up | 0.860811532 |
| POX03202 | hypothetical protein | NA | NA | IPR016181; Acyl-CoA N-acyltransferase                                                        | 69.55   | 275.983 | 1.988458725 | Up | 0.860811532 |
| POX03214 | hypothetical protein | NA | NA | IPR007859; Electron transfer flavoprotein-ubiquinone oxidoreductase                          | 74.4467 | 212.3   | 1.511825212 | Up | 0.813543335 |
| POX03248 | hypothetical protein | NA | NA | IPR008253; Marvel domain                                                                     | 167.757 | 516.167 | 1.621466877 | Up | 0.843281723 |
| POX03300 | hypothetical protein | NA | NA | NA                                                                                           | 53.04   | 232.127 | 2.129759588 | Up | 0.864548852 |
| POX03389 | hypothetical protein | NA | NA | NA                                                                                           | 54.5433 | 3102.55 | 5.829906229 | Up | 0.957412351 |
| POX03665 | hypothetical protein | NA | NA | IPR002067; Mitochondrial carrier protein                                                     | 98.9    | 260.293 | 1.396095936 | Up | 0.804182239 |
| POX03833 | hypothetical protein | NA | NA | IPR004299; Membrane bound O-acyl transferase, MBOAT                                          | 57.9233 | 196.71  | 1.763853768 | Up | 0.835896067 |
| POX03836 | hypothetical protein | NA | NA | NA                                                                                           | 54.75   | 321.957 | 2.555935654 | Up | 0.891617726 |
| POX03937 | hypothetical protein | NA | NA | IPR000796; Aspartate/other aminotransferase                                                  | 264.257 | 1232.73 | 2.221848974 | Up | 0.893450792 |
| POX03950 | hypothetical protein | NA | NA | IPR001753; Crotonase superfamily                                                             | 75.74   | 222.04  | 1.551692272 | Up | 0.819113721 |

|          |                      |     |    |                                                         |         |         |             |    |             |
|----------|----------------------|-----|----|---------------------------------------------------------|---------|---------|-------------|----|-------------|
| POX03973 | hypothetical protein | NA  | NA | IPR021838; Protein of unknown function DUF3431          | 15.5767 | 82.5567 | 2.405998185 | Up | 0.83087738  |
| POX04022 | hypothetical protein | NA  | NA | NA                                                      | 171.513 | 454.673 | 1.406509657 | Up | 0.816141662 |
| POX04289 | hypothetical protein | NA  | NA | IPR001753; Crotonase superfamily                        | 62.11   | 244.143 | 1.974830911 | Up | 0.856504716 |
| POX04352 | hypothetical protein | NA  | NA | IPR028116; Putative oxalocrotonate tautomerase          | 1.48667 | 40.22   | 4.757759967 | Up | 0.813009432 |
| POX04356 | hypothetical protein | NA  | NA | IPR002020; Citrate synthase                             | 113.13  | 434.103 | 1.940056944 | Up | 0.867325147 |
| POX04391 | hypothetical protein | NA  | NA | IPR006254; Isocitrate lyase                             | 74.2433 | 584.68  | 2.977313852 | Up | 0.913632319 |
| POX04450 | hypothetical protein | NA  | NA | IPR000362; Fumarate lyase family                        | 150.91  | 388.56  | 1.364448983 | Up | 0.807172095 |
| POX04452 | hypothetical protein | NA  | NA | IPR000796; Aspartate/other aminotransferase             | 33.7167 | 148.133 | 2.135362497 | Up | 0.850791956 |
| POX04462 | hypothetical protein | NA  | NA | IPR012336; Thioredoxin-like fold                        | 96.7433 | 639.35  | 2.724371771 | Up | 0.907456843 |
| POX04515 | hypothetical protein | NA  | NA | NA                                                      | 73.1667 | 477.817 | 2.707198738 | Up | 0.903523759 |
| POX04526 | hypothetical protein | NA  | NA | IPR002085; Alcohol dehydrogenase superfamily, zinc-type | 7.88    | 86.09   | 3.449578133 | Up | 0.861060687 |
| POX04527 | hypothetical protein | NA  | NA | IPR012336; Thioredoxin-like fold                        | 281.017 | 789.71  | 1.490667262 | Up | 0.833440114 |
| POX04768 | hypothetical protein | NA  | NA | NA                                                      | 28.97   | 113.743 | 1.9731504   | Up | 0.827424809 |
| POX04781 | hypothetical protein | NA  | NA | NA                                                      | 417.137 | 1003.94 | 1.267085803 | Up | 0.805552589 |
| POX04819 | hypothetical protein | NA  | NA | IPR001576; Phosphoglycerate kinase                      | 206.377 | 584.017 | 1.500729675 | Up | 0.832550276 |
| POX04838 | hypothetical protein | NA  | NA | IPR001753; Crotonase superfamily                        | 21.38   | 132.15  | 2.627842667 | Up | 0.865474284 |
| POX04991 | hypothetical protein | NA  | NA | IPR000652; Triosephosphate isomerase                    | 328.23  | 1032.54 | 1.653423318 | Up | 0.852820787 |
| POX05087 | hypothetical protein | NA  | NA | IPR014756; Immunoglobulin E-set                         | 48.0833 | 149.17  | 1.633348602 | Up | 0.813258587 |
| POX05105 | hypothetical protein | NA  | NA | IPR025187; Protein of unknown function DUF4112          | 42.3967 | 140.05  | 1.723919237 | Up | 0.819736608 |
| POX05155 | hypothetical protein | NA  | NA | IPR011701; Major facilitator superfamily                | 35.7367 | 134.49  | 1.912021927 | Up | 0.832123154 |
| POX05260 | hypothetical protein | AA7 | NA | IPR006094; FAD linked oxidase, N-terminal               | 43.7333 | 181     | 2.049184478 | Up | 0.851948745 |
| POX05321 | hypothetical protein | NA  | NA | IPR002198; Short-chain dehydrogenase/reductase SDR      | 34.16   | 186.83  | 2.451346253 | Up | 0.87236163  |
| POX05482 | hypothetical protein | NA  | NA | IPR000454; ATPase, F0 complex, subunit C                | 57.9533 | 589.433 | 3.3463651   | Up | 0.920786617 |
| POX05492 | hypothetical protein | NA  | NA | IPR002067; Mitochondrial carrier protein                | 23.11   | 101.723 | 2.138061478 | Up | 0.831571454 |
| POX05495 | hypothetical protein | NA  | NA | IPR000073; Alpha/beta hydrolase fold-1                  | 28.5967 | 108.253 | 1.920492553 | Up | 0.821498487 |

|          |                      |    |    |                                                                               |         |         |             |    |             |
|----------|----------------------|----|----|-------------------------------------------------------------------------------|---------|---------|-------------|----|-------------|
| POX05577 | hypothetical protein | NA | NA | NA                                                                            | 181.203 | 491.683 | 1.440119958 | Up | 0.821658658 |
| POX05586 | hypothetical protein | NA | NA | IPR002376; Formyl transferase, N-terminal                                     | 49.6667 | 234.197 | 2.237370712 | Up | 0.871276028 |
| POX05593 | hypothetical protein | NA | NA | IPR008030; NmrA-like domain//<br>IPR016040; NAD(P)-binding domain             | 51.3733 | 179.7   | 1.806498818 | Up | 0.836501157 |
| POX05697 | hypothetical protein | NA | NA | IPR015590; Aldehyde dehydrogenase domain                                      | 42.9333 | 150.777 | 1.81224309  | Up | 0.830147713 |
| POX05796 | hypothetical protein | NA | NA | IPR001841; Zinc finger, RING-type//                                           | 70.35   | 246.543 | 1.809218914 | Up | 0.846075814 |
| POX05956 | hypothetical protein | NA | NA | IPR007667; Hypoxia induced protein, domain                                    | 131.697 | 350.567 | 1.412469995 | Up | 0.811710269 |
| POX05960 | hypothetical protein | NA | NA | IPR002155; Thiolase                                                           | 135.39  | 360.52  | 1.412958111 | Up | 0.812244172 |
| POX06017 | hypothetical protein | NA | NA | IPR006683; Thioesterase superfamily                                           | 43.52   | 152.39  | 1.808017773 | Up | 0.830485852 |
| POX06020 | hypothetical protein | NA | NA | IPR005593; Xylulose 5-phosphate/Fructose 6-phosphate<br>phosphoketolase       | 534.477 | 1263.46 | 1.241184925 | Up | 0.80181527  |
| POX06092 | hypothetical protein | NA | NA | IPR009686; Senescence/spartin-associated                                      | 286.073 | 709.04  | 1.309481997 | Up | 0.808453461 |
| POX06117 | hypothetical protein | NA | NA | IPR006089; Acyl-CoA dehydrogenase, conserved site                             | 114.563 | 330.543 | 1.528694043 | Up | 0.827211248 |
| POX06121 | hypothetical protein | NA | NA | NA                                                                            | 77.8833 | 239.94  | 1.623287151 | Up | 0.828029899 |
| POX06204 | hypothetical protein | NA | NA | IPR002067; Mitochondrial carrier protein                                      | 392.227 | 1050.53 | 1.421357832 | Up | 0.82576971  |
| POX06223 | hypothetical protein | NA | NA | NA                                                                            | 8.38667 | 51.3367 | 2.613820202 | Up | 0.800444919 |
| POX06224 | hypothetical protein | NA | NA | IPR002293; Amino acid/polyamine transporter I                                 | 58.18   | 229.287 | 1.978557261 | Up | 0.855632675 |
| POX06283 | hypothetical protein | NA | NA | IPR011701; Major facilitator superfamily                                      | 0.31667 | 79.7233 | 7.975893209 | Up | 0.912867058 |
| POX06361 | hypothetical protein | NA | NA | IPR001917; Aminotransferase, class-II, pyridoxal-phosphate<br>binding site    | 46.0433 | 197.413 | 2.100155246 | Up | 0.858035238 |
| POX06446 | hypothetical protein | NA | NA | IPR002068; Alpha crystallin/Hsp20 domain                                      | 50.6167 | 195.84  | 1.951991055 | Up | 0.848709735 |
| POX06621 | hypothetical protein | NA | NA | IPR009027; Ribosomal protein L9/RNase H1, N-terminal                          | 307.687 | 802.453 | 1.382955568 | Up | 0.819220502 |
| POX06646 | hypothetical protein | NA | NA | IPR000941; Enolase                                                            | 639.71  | 1584.4  | 1.308449701 | Up | 0.812991636 |
| POX06699 | hypothetical protein | NA | NA | IPR000634; Serine/threonine dehydratase, pyridoxal-phosphate-<br>binding site | 26.83   | 136.81  | 2.350254727 | Up | 0.857269977 |

|          |                      |    |    |                                                                                      |         |         |             |    |             |
|----------|----------------------|----|----|--------------------------------------------------------------------------------------|---------|---------|-------------|----|-------------|
| POX06725 | hypothetical protein | NA | NA | IPR002539; MaoC-like domain                                                          | 21.8467 | 121.6   | 2.476658152 | Up | 0.85654031  |
| POX06753 | hypothetical protein | NA | NA | IPR008816; Glycine zipper 2TM domain                                                 | 1015.94 | 3819.25 | 1.910468165 | Up | 0.877843033 |
| POX06754 | hypothetical protein | NA | NA | NA                                                                                   | 7.91    | 129.647 | 4.034763609 | Up | 0.891475351 |
| POX06848 | hypothetical protein | NA | NA | IPR004045; Glutathione S-transferase, N-terminal                                     | 50.58   | 213.7   | 2.078947966 | Up | 0.859103043 |
| POX06874 | hypothetical protein | NA | NA | IPR004136; Nitronate monooxygenase                                                   | 9.8     | 808.437 | 6.366209197 | Up | 0.9571454   |
| POX06884 | hypothetical protein | NA | NA | IPR002067; Mitochondrial carrier protein                                             | 2660.28 | 6764.43 | 1.34638956  | Up | 0.82071543  |
| POX06901 | hypothetical protein | NA | NA | IPR012292; Globin/Protoglobin                                                        | 125.167 | 433.273 | 1.791427039 | Up | 0.856682684 |
| POX06915 | hypothetical protein | NA | NA | IPR011701; Major facilitator superfamily                                             | 68.2133 | 217.493 | 1.672845511 | Up | 0.831090941 |
| POX06926 | hypothetical protein | NA | NA | NA                                                                                   | 689.52  | 1694.14 | 1.296891636 | Up | 0.811906033 |
| POX07055 | hypothetical protein | NA | NA | IPR016039; Thiolase-like                                                             | 18.29   | 188.623 | 3.366381173 | Up | 0.896956754 |
| POX07072 | hypothetical protein | NA | NA | IPR011893; Selenoprotein, Rdx type                                                   | 42.3767 | 130.133 | 1.618648537 | Up | 0.80565937  |
| POX07177 | hypothetical protein | NA | NA | IPR003736; Phenylacetic acid degradation-related domain                              | 26.1733 | 95.88   | 1.873132237 | Up | 0.811639082 |
| POX07255 | hypothetical protein | NA | NA | NA                                                                                   | 107.753 | 282.657 | 1.391318225 | Up | 0.80500089  |
| POX07291 | hypothetical protein | NA | NA | IPR018108; Mitochondrial substrate/solute carrier                                    | 83.6433 | 759.52  | 3.182765493 | Up | 0.920181527 |
| POX07339 | hypothetical protein | NA | NA | IPR009009; RlpA-like double-psi beta-barrel domain                                   | 16.0433 | 146.547 | 3.191314325 | Up | 0.884089696 |
| POX07364 | hypothetical protein | NA | NA | IPR001214; SET domain//IPR003616; Post-SET domain                                    | 12.8267 | 73.6767 | 2.522061493 | Up | 0.827798541 |
| POX07393 | hypothetical protein | NA | NA | IPR003439; ABC transporter-like//IPR013103                                           | 20.85   | 87.89   | 2.075651643 | Up | 0.818633209 |
| POX07416 | hypothetical protein | NA | NA | IPR020846; Major facilitator superfamily domain                                      | 23.0933 | 92.4167 | 2.000676625 | Up | 0.817440826 |
| POX07419 | hypothetical protein | NA | NA | IPR006913; Glutathione-dependent formaldehyde-activating enzyme/centromere protein V | 17.6367 | 73.4033 | 2.057267662 | Up | 0.804555971 |
| POX07456 | hypothetical protein | NA | NA | IPR002048; EF-hand domain                                                            | 51.0933 | 157.793 | 1.626829288 | Up | 0.815518776 |
| POX07795 | hypothetical protein | NA | NA | IPR009291; Vacuolar protein sorting-associated protein 62                            | 27.7333 | 104.77  | 1.91753274  | Up | 0.819683218 |
| POX07938 | hypothetical protein | NA | NA | IPR001138; Zn(2)-C6 fungal-type DNA-binding domain                                   | 13.6367 | 201.973 | 3.888601884 | Up | 0.90560598  |
| POX07996 | hypothetical protein | NA | NA | IPR007138; Antibiotic biosynthesis monooxygenase domain                              | 34.5533 | 183.593 | 2.409616874 | Up | 0.870297206 |
| POX08125 | hypothetical protein | NA | NA | IPR002085; Alcohol dehydrogenase superfamily, zinc-type                              | 36.9267 | 120.953 | 1.711715586 | Up | 0.811443317 |

|          |                       |                        |                       |                                                                                                |         |         |              |      |             |
|----------|-----------------------|------------------------|-----------------------|------------------------------------------------------------------------------------------------|---------|---------|--------------|------|-------------|
| POX08455 | hypothetical protein  | NA                     | NA                    | IPR000898; Indoleamine 2,3-dioxygenase                                                         | 102.567 | 268.503 | 1.388378056  | Up   | 0.803826304 |
| POX08459 | hypothetical protein  | NA                     | NA                    | IPR001452; SH3 domain                                                                          | 69.1967 | 201.773 | 1.543961071  | Up   | 0.815607759 |
| POX08478 | hypothetical protein  | NA                     | NA                    | IPR002068; Alpha crystallin/Hsp20 domain                                                       | 588.997 | 3069.26 | 2.381561055  | Up   | 0.903470368 |
| POX08659 | hypothetical protein  | NA                     | NA                    | IPR002655; Acyl-CoA oxidase, C-terminal                                                        | 8.02667 | 73.8933 | 3.202571319  | Up   | 0.845862253 |
| POX08794 | hypothetical protein  | NA                     | NA                    | IPR017926; Glutamine amidotransferase                                                          | 30.62   | 146.283 | 2.256219219  | Up   | 0.857092009 |
| POX08821 | hypothetical protein  | NA                     | NA                    | NA                                                                                             | 227.2   | 860.193 | 1.920698115  | Up   | 0.873233671 |
| POX08822 | hypothetical protein  | NA                     | NA                    | IPR000971; Globin                                                                              | 393.447 | 2591.82 | 2.719727392  | Up   | 0.914984873 |
| POX08943 | hypothetical protein  | NA                     | NA                    | IPR001260; Coproporphyrinogen III oxidase, aerobic                                             | 60.9267 | 182.823 | 1.585304493  | Up   | 0.817120484 |
| POX08956 | hypothetical protein  | NA                     | NA                    | IPR002489; Glutamate synthase, alpha subunit, C-terminal                                       | 45.6567 | 133.833 | 1.551540048  | Up   | 0.800800854 |
| POX08961 | hypothetical protein  | NA                     | NA                    | IPR031342; Meiotically up-regulated gene 163 protein/<br>YGR053C                               | 41.3033 | 125.583 | 1.604314889  | Up   | 0.802438156 |
| POX09344 | hypothetical protein  | NA                     | NA                    | IPR006091; Acyl-CoA oxidase/dehydrogenase, central domain                                      | 35.2667 | 111.683 | 1.66303678   | Up   | 0.803363588 |
| POX09345 | hypothetical protein  | NA                     | NA                    | IPR018809; Protein of unknown function DUF2406                                                 | 240.257 | 600.147 | 1.320738653  | Up   | 0.808115323 |
| POX09632 | hypothetical protein  | NA                     | NA                    | IPR011701; Major facilitator superfamily                                                       | 16.3933 | 194.83  | 3.571034702  | Up   | 0.9005517   |
| POX09827 | hypothetical protein  | NA                     | NA                    | NA                                                                                             | 39.5267 | 162.437 | 2.038979126  | Up   | 0.847962271 |
| POX01218 | acetyl xylan esterase | CBM1;<br>CE1           | Acetyl xylan esterase | IPR000254; Cellulose-binding domain, fungal//<br>IPR010126; Esterase, PHB depolymerase         | 580.17  | 112.363 | -2.368304368 | Down | 0.894571988 |
| POX02710 | alpha-1, 3-glucanase  | GH71                   | NA                    | IPR005197; Glycoside hydrolase family 71                                                       | 449.683 | 60.1167 | -2.903072492 | Down | 0.908079729 |
| POX09352 | alpha-amylase Amy13A  | CBM20;<br>GH13         | NA                    | IPR002044; Carbohydrate binding module family 20//<br>IPR006047; Glycosyl hydrolase, family 13 | 1305.54 | 546.347 | -1.256758098 | Down | 0.805018687 |
| POX09085 | alpha-galactosidase   | CBM1;<br>GH27;<br>GH36 | alpha-galactosidase   | IPR000254; Cellulose-binding domain, fungal//<br>IPR002241; Glycoside hydrolase, family 27     | 892.003 | 273.363 | -1.706229356 | Down | 0.857536928 |
| POX03741 | alpha-glucosidase     | GH13                   | NA                    | IPR006047; Glycosyl hydrolase, family 13, catalytic domain                                     | 211.83  | 54.7767 | -1.951273541 | Down | 0.851308062 |
| POX06751 | alpha-glucosidase     | GH31                   | NA                    | IPR000322; Glycoside hydrolase family 31                                                       | 185.063 | 27.3333 | -2.759285768 | Down | 0.882434597 |

|          |                                     |                |                                                     |                                                                                |         |         |              |      |             |
|----------|-------------------------------------|----------------|-----------------------------------------------------|--------------------------------------------------------------------------------|---------|---------|--------------|------|-------------|
| POX01921 | alpha-L-arabinofuranosidase         | GH43           | beta-xylosidase/<br>alpha-L-<br>arabinofuranosidase | IPR006710; Glycoside hydrolase, family 43                                      | 82.4033 | 10.4167 | -2.983809009 | Down | 0.849261434 |
| POX05240 | alpha-L-arabinofuranosidase         | GH117;<br>GH43 | beta-xylosidase/<br>alpha-L-<br>arabinofuranosidase | IPR006710; Glycoside hydrolase, family 43                                      | 47.82   | 3.47    | -3.784606562 | Down | 0.819434063 |
| POX05540 | alpha-L-arabinofuranosidase         | GH62           | beta-xylosidase/<br>alpha-L-<br>arabinofuranosidase | IPR005193; Glycoside hydrolase, family 62, arabinosidase                       | 107.867 | 10.2867 | -3.390401641 | Down | 0.873500623 |
| POX06789 | alpha-L-rhamnosidase                | GH78           | NA                                                  | IPR008902; Bacterial alpha-L-rhamnosidase                                      | 85.89   | 17.4633 | -2.29816121  | Down | 0.829596014 |
| POX00053 | alpha-mannosidase                   | GH92           | NA                                                  | IPR005887; Alpha-1,2-mannosidase, putative                                     | 91.6367 | 6.57333 | -3.80122793  | Down | 0.869567539 |
| POX01189 | alpha-mannosidase                   | GH47           | NA                                                  | IPR001382; Glycoside hydrolase family 47                                       | 630.523 | 159.723 | -1.980974675 | Down | 0.874426054 |
| POX06301 | alpha-mannosidase                   | GH47           | NA                                                  | IPR001382; Glycoside hydrolase family 47                                       | 302.357 | 80.6633 | -1.906266459 | Down | 0.857999644 |
| POX04559 | beta-1,3-galactosyltransferase      | NA             | NA                                                  | IPR003378; Fringe-like//IPR003609; PAN/Apple domain                            | 114.05  | 14.18   | -3.007737009 | Down | 0.869425165 |
| POX07534 | beta-1,3-glucanosyltransferase      | GH17           | NA                                                  | IPR013781; Glycoside hydrolase, catalytic domain                               | 4980.43 | 1738.51 | -1.518416175 | Down | 0.84411817  |
| POX04626 | beta-1,3-glucanosyltransglycosylase | CBM43;<br>GH72 | NA                                                  | IPR004886; Glucanosyltransferase                                               | 569.86  | 221.657 | -1.362280775 | Down | 0.8131874   |
| POX08390 | beta-1,6-glucanase                  | GH30           | NA                                                  | IPR001139; Glycoside hydrolase, family 30                                      | 277.17  | 52.3733 | -2.403866779 | Down | 0.882238833 |
| POX09120 | beta-glucanase                      | GH16           | NA                                                  | IPR000757; Glycoside hydrolase, family 16                                      | 145.49  | 32.3733 | -2.168042169 | Down | 0.852019932 |
| POX06835 | beta-glucosidase BGL1               | GH3            | beta-glucosidase                                    | IPR001764; Glycoside hydrolase, family 3, N-terminal                           | 442.93  | 146.977 | -1.591491578 | Down | 0.837978288 |
| POX06900 | beta-glucuronidase                  | GH2            | NA                                                  | IPR006102; Glycoside hydrolase, family 2, immunoglobulin-like<br>beta-sandwich | 88.45   | 25.3533 | -1.802686705 | Down | 0.801370351 |
| POX08337 | beta-glucuronidase                  | GH79           | NA                                                  | IPR013781; Glycoside hydrolase, catalytic domain                               | 492.427 | 44.5133 | -3.467599446 | Down | 0.920519665 |
| POX02591 | carbohydrate acetyltransferase      | CE16           | NA                                                  | IPR001087; GDSL lipase/esterase                                                | 96.4667 | 23.96   | -2.009402608 | Down | 0.820733227 |
| POX05968 | cellulose monoxygenase              | AA9            | cellulose<br>monoxygenase                           | IPR005103; Glycoside hydrolase, family 61                                      | 122.66  | 23.2933 | -2.396675843 | Down | 0.854084357 |



|          |                                                                            |             |                                        |                                                                                             |         |         |              |      |             |
|----------|----------------------------------------------------------------------------|-------------|----------------------------------------|---------------------------------------------------------------------------------------------|---------|---------|--------------|------|-------------|
| POX02308 | cellulose monoxygenase Cel61A                                              | AA9         | cellulose monoxygenase                 | IPR005103; Glycoside hydrolase, family 61                                                   | 10021.9 | 3847.04 | -1.381339151 | Down | 0.824968856 |
| POX07423 | chitin binding domain- and peptidoglycan binding domain-containing protein | CBM18       | NA                                     | IPR001002; Chitin-binding, type 1                                                           | 265.84  | 68.94   | -1.947144994 | Down | 0.857287774 |
| POX01381 | chitin binding domain-containing protein                                   | AA11        | NA                                     | NA                                                                                          | 475.033 | 169.727 | -1.484815499 | Down | 0.826232426 |
| POX00089 | chitinase                                                                  | GH18        | NA                                     | IPR001223; Glycoside hydrolase family 18, catalytic domain                                  | 6795.32 | 1209.49 | -2.490138674 | Down | 0.908382274 |
| POX07424 | chitinase                                                                  | GH18        | NA                                     | IPR001223; Glycoside hydrolase family 18, catalytic domain                                  | 223.447 | 54.1267 | -2.045519074 | Down | 0.858675921 |
| POX09387 | chitinase                                                                  | GH18        | NA                                     | IPR001223; Glycoside hydrolase family 18, catalytic domain                                  | 2003.3  | 507.343 | -1.98134419  | Down | 0.881188824 |
| POX08903 | chitosanase                                                                | GH75        | NA                                     | IPR009939; Fungal chitosanase                                                               | 269.643 | 17.97   | -3.907390051 | Down | 0.914201815 |
| POX07378 | cutinase                                                                   | CE5         | NA                                     | IPR000675; Cutinase                                                                         | 2223.22 | 243.943 | -3.188032756 | Down | 0.926054458 |
| POX03738 | endo-alpha-1, 4-polygalactosaminidase                                      | GH114       | NA                                     | IPR004352; Glycoside-hydrolase family GH114, TIM-barrel domain                              | 517.857 | 131.133 | -1.981518384 | Down | 0.872201459 |
| POX07535 | endo-beta-1, 4-glucanase                                                   | GH12        | endo-beta-1,4-glucanase                | IPR002594; Glycoside hydrolase, family 12                                                   | 387.733 | 26.97   | -3.845637342 | Down | 0.921534081 |
| POX05916 | endo-beta-1, 4-xylanase                                                    | GH10        | endo-beta-1,4-xylanase                 | IPR001000; Glycoside hydrolase, family 10                                                   | 298.08  | 51.2467 | -2.540169507 | Down | 0.889268553 |
| POX03730 | endopolygalacturonase                                                      | GH28        | polygalacturonase; rhamnogalacturonase | IPR000743; Glycoside hydrolase, family 28                                                   | 380.173 | 22.64   | -4.069711477 | Down | 0.923918847 |
| POX01219 | exo-beta-1, 3-galactanase                                                  | CBM35; GH43 | NA                                     | IPR005084; Carbohydrate binding module family 6// IPR006710; Glycoside hydrolase, family 43 | 170.113 | 20.8067 | -3.031378461 | Down | 0.886545649 |
| POX09801 | exo-beta-1, 3-galactanase                                                  | GH43        | NA                                     | IPR006710; Glycoside hydrolase, family 43                                                   | 97.9867 | 20.23   | -2.276089131 | Down | 0.837124043 |
| POX00105 | exo-beta-1, 3-glucanase                                                    | GH55        | NA                                     | IPR011050; Pectin lyase fold/virulence factor                                               | 284.957 | 67.9    | -2.069259066 | Down | 0.866168357 |
| POX06324 | exo-beta-1, 3-glucanase                                                    | GH55        | NA                                     | IPR011050; Pectin lyase fold/virulence factor                                               | 105.913 | 24.13   | -2.1339844   | Down | 0.832817227 |
| POX01117 | feruloyl esterase                                                          | NA          | Feruloyl esterase                      | IPR011118; Tannase/feruloyl esterase                                                        | 89.8833 | 18.0967 | -2.312329645 | Down | 0.833262146 |

|          |                      |    |    |                                                                                                           |         |         |              |      |             |
|----------|----------------------|----|----|-----------------------------------------------------------------------------------------------------------|---------|---------|--------------|------|-------------|
| POX06393 | histone H3           | NA | NA | IPR000164; Histone H3/CENP-A                                                                              | 3842.3  | 1581.43 | -1.28074172  | Down | 0.810873821 |
| POX06394 | histone H4           | NA | NA | IPR001951; Histone H4                                                                                     | 1767.28 | 615.217 | -1.522361418 | Down | 0.842427478 |
| POX00044 | hypothetical protein | NA | NA | IPR008427; Extracellular membrane protein, CFEM domain                                                    | 533.44  | 213.687 | -1.319829118 | Down | 0.806709379 |
| POX00093 | hypothetical protein | NA | NA | NA                                                                                                        | 853.987 | 351.9   | -1.279048031 | Down | 0.806015305 |
| POX00243 | hypothetical protein | NA | NA | IPR009311; Interferon alpha-inducible protein 6/27                                                        | 64.9467 | 2.27    | -4.83849128  | Down | 0.857875067 |
| POX00244 | hypothetical protein | NA | NA | NA                                                                                                        | 90.7333 | 4.18667 | -4.437758697 | Down | 0.876686243 |
| POX00338 | hypothetical protein | NA | NA | IPR021851; Protein of unknown function DUF3455                                                            | 124.483 | 4.03333 | -4.947836146 | Down | 0.899750845 |
| POX00388 | hypothetical protein | NA | NA | IPR026777; Plasma membrane fusion protein PRM1                                                            | 144.023 | 24.5333 | -2.553487392 | Down | 0.867609895 |
| POX00429 | hypothetical protein | NA | NA | IPR011701; Major facilitator superfamily                                                                  | 385.403 | 128.447 | -1.585199598 | Down | 0.835611319 |
| POX00449 | hypothetical protein | NA | NA | IPR001849; Pleckstrin homology domain                                                                     | 1304.15 | 389.807 | -1.742282832 | Down | 0.863053924 |
| POX00453 | hypothetical protein | NA | NA | IPR006076; FAD dependent oxidoreductase                                                                   | 120.013 | 25.0333 | -2.261272384 | Down | 0.847357181 |
| POX00610 | hypothetical protein | NA | NA | NA                                                                                                        | 1034.88 | 384.143 | -1.429746867 | Down | 0.827264638 |
| POX00775 | hypothetical protein | NA | NA | IPR031606; Potassium transporter Kch                                                                      | 136.51  | 44.45   | -1.618751315 | Down | 0.807972949 |
| POX00795 | hypothetical protein | NA | NA | IPR002129; Pyridoxal phosphate-dependent decarboxylase                                                    | 358.273 | 135.21  | -1.40585881  | Down | 0.812048407 |
| POX00837 | hypothetical protein | NA | NA | IPR011701; Major facilitator superfamily                                                                  | 492.613 | 115.373 | -2.09414587  | Down | 0.878270155 |
| POX00961 | hypothetical protein | NA | NA | IPR004160; Translation elongation factor EFTu/EF1A, C-terminal                                            | 147.32  | 49.8967 | -1.561937957 | Down | 0.80621107  |
| POX01184 | hypothetical protein | NA | NA | NA                                                                                                        | 66.2433 | 7.90333 | -3.067242108 | Down | 0.835397758 |
| POX01188 | hypothetical protein | NA | NA | NA                                                                                                        | 195.323 | 15.6733 | -3.639480361 | Down | 0.901548318 |
| POX01193 | hypothetical protein | NA | NA | NA                                                                                                        | 62.5333 | 3.45667 | -4.177172029 | Down | 0.847962271 |
| POX01201 | hypothetical protein | NA | NA | IPR005828; Major facilitator, sugar transporter-like//<br>IPR020846; Major facilitator superfamily domain | 483.62  | 165.563 | -1.546490708 | Down | 0.835860473 |
| POX01460 | hypothetical protein | NA | NA | IPR001251; CRAL-TRIO lipid binding domain                                                                 | 101.28  | 29.26   | -1.791347635 | Down | 0.809165332 |
| POX01614 | hypothetical protein | NA | NA | NA                                                                                                        | 104.43  | 25.5733 | -2.029824095 | Down | 0.826143442 |
| POX01636 | hypothetical protein | NA | NA | IPR002110; Ankyrin repeat                                                                                 | 469.25  | 177.727 | -1.400696581 | Down | 0.815643353 |

|          |                      |      |    |                                                               |         |         |              |      |             |
|----------|----------------------|------|----|---------------------------------------------------------------|---------|---------|--------------|------|-------------|
| POX01704 | hypothetical protein | NA   | NA | NA                                                            | 280.253 | 29.3367 | -3.255954671 | Down | 0.905944118 |
| POX01763 | hypothetical protein | NA   | NA | NA                                                            | 371.407 | 101.657 | -1.869294881 | Down | 0.859494572 |
| POX01764 | hypothetical protein | NA   | NA | IPR001338; Hydrophobin                                        | 706.293 | 93.31   | -2.920163871 | Down | 0.913863677 |
| POX01797 | hypothetical protein | NA   | NA | IPR018535; Domain of unknown function DUF1996                 | 123.273 | 38.9867 | -1.660808032 | Down | 0.808400071 |
| POX01798 | hypothetical protein | NA   | NA | IPR001395; Aldo/keto reductase/potassium channel subunit beta | 610.03  | 190.25  | -1.680983739 | Down | 0.852073323 |
| POX01825 | hypothetical protein | GT90 | NA | IPR006598; Lipopolysaccharide-modifying protein               | 99.8    | 14.1133 | -2.821981047 | Down | 0.856700481 |
| POX01875 | hypothetical protein | NA   | NA | IPR002921; Fungal lipase-like domain                          | 219.563 | 69.3133 | -1.663432342 | Down | 0.830396868 |
| POX01918 | hypothetical protein | NA   | NA | IPR013057; Amino acid transporter, transmembrane domain       | 140.163 | 38.4967 | -1.864303553 | Down | 0.830788397 |
| POX01929 | hypothetical protein | NA   | NA | IPR001563; Peptidase S10, serine carboxypeptidase             | 1031.48 | 168.18  | -2.616642455 | Down | 0.907848372 |
| POX01942 | hypothetical protein | NA   | NA | IPR002293; Amino acid/polyamine transporter I                 | 200.577 | 47.6067 | -2.074918263 | Down | 0.8565937   |
| POX01949 | hypothetical protein | NA   | NA | NA                                                            | 168.63  | 22.3133 | -2.917883265 | Down | 0.883324435 |
| POX01987 | hypothetical protein | NA   | NA | NA                                                            | 302.963 | 32.0433 | -3.241047061 | Down | 0.907456843 |
| POX02008 | hypothetical protein | NA   | NA | NA                                                            | 487.1   | 130.727 | -1.89766452  | Down | 0.866275138 |
| POX02016 | hypothetical protein | NA   | NA | IPR003154; S1/P1 nuclease                                     | 113.723 | 21.05   | -2.433636153 | Down | 0.850720769 |
| POX02066 | hypothetical protein | NA   | NA | IPR017795; Aromatic prenyltransferase, DMATS type             | 69.9133 | 4.87    | -3.843573944 | Down | 0.851895355 |
| POX02067 | hypothetical protein | NA   | NA | NA                                                            | 560.39  | 72.93   | -2.941846912 | Down | 0.91197722  |
| POX02068 | hypothetical protein | NA   | NA | IPR001128; Cytochrome P450                                    | 149.163 | 11.3933 | -3.710631141 | Down | 0.893183841 |
| POX02231 | hypothetical protein | NA   | NA | IPR013920; Protein of unknown function DUF1774, fungi         | 1978.91 | 840.8   | -1.234873856 | Down | 0.801690692 |
| POX02355 | hypothetical protein | NA   | NA | IPR003439; ABC transporter-like                               | 241.693 | 69.5967 | -1.796087565 | Down | 0.845132586 |
| POX02396 | hypothetical protein | NA   | NA | NA                                                            | 174.027 | 49.3067 | -1.819453763 | Down | 0.836323189 |
| POX02405 | hypothetical protein | NA   | NA | IPR000109; Proton-dependent oligopeptide transporter family   | 1649.7  | 481.037 | -1.777987836 | Down | 0.866631073 |
| POX02407 | hypothetical protein | NA   | NA | IPR002198; Short-chain dehydrogenase/reductase SDR            | 569.82  | 146.187 | -1.962694527 | Down | 0.872183663 |
| POX02485 | hypothetical protein | NA   | NA | IPR001660; Sterile alpha motif domain                         | 894.1   | 348.213 | -1.360464752 | Down | 0.817262858 |
| POX02502 | hypothetical protein | NA   | NA | NA                                                            | 54.06   | 6.36    | -3.087462841 | Down | 0.819202705 |
| POX02529 | hypothetical protein | NA   | NA | NA                                                            | 329.16  | 56.2867 | -2.54792391  | Down | 0.89186688  |

|          |                      |    |    |                                                                                            |         |         |              |      |             |
|----------|----------------------|----|----|--------------------------------------------------------------------------------------------|---------|---------|--------------|------|-------------|
| POX02553 | hypothetical protein | NA | NA | IPR004813; Oligopeptide transporter, OPT superfamily                                       | 815.58  | 141.487 | -2.527160294 | Down | 0.904039865 |
| POX02595 | hypothetical protein | NA | NA | NA                                                                                         | 108.883 | 23.77   | -2.195569331 | Down | 0.838707955 |
| POX02623 | hypothetical protein | NA | NA | IPR000132; Nitrilase/cyanide hydratase, conserved site                                     | 65.0333 | 12.0133 | -2.436542862 | Down | 0.814646734 |
| POX02721 | hypothetical protein | NA | NA | IPR000791; GPR1/FUN34/yaaH                                                                 | 1512.54 | 643.33  | -1.233342424 | Down | 0.800800854 |
| POX02754 | hypothetical protein | NA | NA | NA                                                                                         | 174.657 | 55.27   | -1.659953194 | Down | 0.823634099 |
| POX02811 | hypothetical protein | NA | NA | IPR001107; Band 7 domain                                                                   | 727.753 | 287.437 | -1.340205432 | Down | 0.812973839 |
| POX02834 | hypothetical protein | NA | NA | NA                                                                                         | 115.383 | 37.5033 | -1.621344113 | Down | 0.800088984 |
| POX02847 | hypothetical protein | NA | NA | NA                                                                                         | 1687.87 | 309.33  | -2.447987977 | Down | 0.904662751 |
| POX02858 | hypothetical protein | NA | NA | NA                                                                                         | 160.943 | 27.7633 | -2.535300121 | Down | 0.870937889 |
| POX02972 | hypothetical protein | NA | NA | NA                                                                                         | 308.263 | 33.24   | -3.21317101  | Down | 0.907296672 |
| POX03078 | hypothetical protein | NA | NA | IPR000718; Peptidase M13                                                                   | 306.86  | 113.08  | -1.440236811 | Down | 0.812991636 |
| POX03084 | hypothetical protein | NA | NA | NA                                                                                         | 56.3533 | 6.31333 | -3.158027119 | Down | 0.824061221 |
| POX03094 | hypothetical protein | NA | NA | NA                                                                                         | 81.32   | 7.82    | -3.378369703 | Down | 0.856113187 |
| POX03234 | hypothetical protein | NA | NA | IPR008217; Ccc1 family                                                                     | 88.4833 | 19.8633 | -2.155297989 | Down | 0.824434953 |
| POX03465 | hypothetical protein | NA | NA | NA                                                                                         | 196.047 | 64.6267 | -1.600995625 | Down | 0.820092543 |
| POX03540 | hypothetical protein | NA | NA | IPR011250; Outer membrane protein/outer membrane enzyme<br>PagP, beta-barrel               | 121.99  | 9.97    | -3.613025574 | Down | 0.883413419 |
| POX03600 | hypothetical protein | NA | NA | IPR011701; Major facilitator superfamily                                                   | 64.1667 | 13.88   | -2.208816472 | Down | 0.803861897 |
| POX03627 | hypothetical protein | NA | NA | IPR001663; Aromatic-ring-hydroxylating dioxygenase, alpha<br>subunit                       | 226.023 | 61.51   | -1.877578835 | Down | 0.848691938 |
| POX03666 | hypothetical protein | NA | NA | IPR001128; Cytochrome P450                                                                 | 118.94  | 29.2567 | -2.023396669 | Down | 0.832479089 |
| POX03728 | hypothetical protein | NA | NA | IPR011701; Major facilitator superfamily                                                   | 88.5867 | 23.29   | -1.927378933 | Down | 0.810304325 |
| POX03742 | hypothetical protein | NA | NA | IPR003663; Sugar/inositol transporter//<br>IPR020846; Major facilitator superfamily domain | 417.503 | 140.7   | -1.569165387 | Down | 0.835326571 |
| POX03782 | hypothetical protein | NA | NA | IPR006771; Blastomyces yeast-phase-specific protein                                        | 234.223 | 56.4033 | -2.054032473 | Down | 0.859903897 |

|          |                      |    |    |                                                                                            |         |         |              |      |             |
|----------|----------------------|----|----|--------------------------------------------------------------------------------------------|---------|---------|--------------|------|-------------|
| POX03873 | hypothetical protein | NA | NA | IPR001138; Zn(2)-C6 fungal-type DNA-binding domain                                         | 161.82  | 44.4467 | -1.864242796 | Down | 0.836803702 |
| POX03935 | hypothetical protein | NA | NA | NA                                                                                         | 61.5367 | 0.01    | -12.58723058 | Down | 0.905872931 |
| POX04276 | hypothetical protein | NA | NA | IPR003663; Sugar/inositol transporter//<br>IPR020846; Major facilitator superfamily domain | 386.213 | 118.89  | -1.699770599 | Down | 0.846769888 |
| POX04278 | hypothetical protein | NA | NA | NA                                                                                         | 629.47  | 195.72  | -1.685346434 | Down | 0.853176722 |
| POX04316 | hypothetical protein | NA | NA | IPR003663; Sugar/inositol transporter//<br>IPR020846; Major facilitator superfamily domain | 325.093 | 88.0267 | -1.884841428 | Down | 0.857714896 |
| POX04529 | hypothetical protein | NA | NA | IPR003663; Sugar/inositol transporter//<br>IPR020846; Major facilitator superfamily domain | 1601.63 | 117.193 | -3.772581497 | Down | 0.933279943 |
| POX04531 | hypothetical protein | NA | NA | IPR003663; Sugar/inositol transporter//<br>IPR020846; Major facilitator superfamily domain | 705.667 | 243.7   | -1.533880612 | Down | 0.83835202  |
| POX04534 | hypothetical protein | NA | NA | NA                                                                                         | 51.6667 | 2.85667 | -4.176829201 | Down | 0.831802812 |
| POX04552 | hypothetical protein | NA | NA | NA                                                                                         | 153.047 | 46.4967 | -1.718772425 | Down | 0.823634099 |
| POX04801 | hypothetical protein | NA | NA | IPR015879; Aromatic-ring-hydroxylating dioxygenase, alpha<br>subunit, C-terminal domain    | 224.083 | 67.6    | -1.728940198 | Down | 0.837159637 |
| POX04866 | hypothetical protein | NA | NA | IPR000092; Polyprenyl synthetase                                                           | 90.5467 | 8.87    | -3.351655522 | Down | 0.862413241 |
| POX04867 | hypothetical protein | NA | NA | IPR001128; Cytochrome P450                                                                 | 165.88  | 19.5567 | -3.084407556 | Down | 0.88686599  |
| POX04888 | hypothetical protein | NA | NA | NA                                                                                         | 164.023 | 56.8933 | -1.527569547 | Down | 0.807759388 |
| POX05007 | hypothetical protein | NA | NA | IPR001461; Aspartic peptidase                                                              | 1814.46 | 11.3267 | -7.323675741 | Down | 0.976864211 |
| POX05017 | hypothetical protein | NA | NA | IPR006461; PLAC8 motif-containing protein                                                  | 333.41  | 90.8567 | -1.875633094 | Down | 0.858124221 |
| POX05076 | hypothetical protein | NA | NA | IPR003663; Sugar/inositol transporter//<br>IPR020846; Major facilitator superfamily domain | 76.5833 | 11.2733 | -2.764116297 | Down | 0.837675743 |
| POX05112 | hypothetical protein | NA | NA | IPR022234; Protein of unknown function DUF3759                                             | 366.887 | 98.3267 | -1.899679835 | Down | 0.861274248 |
| POX05220 | hypothetical protein | NA | NA | NA                                                                                         | 82.9633 | 8.47333 | -3.291472331 | Down | 0.855792846 |
| POX05271 | hypothetical protein | NA | NA | IPR003864; Calcium-dependent channel, 7TM region, putative                                 | 120.837 | 39.2633 | -1.621803729 | Down | 0.802082221 |

|          |                      |    |    | phosphate                                                                                  |         |         |              |      |             |
|----------|----------------------|----|----|--------------------------------------------------------------------------------------------|---------|---------|--------------|------|-------------|
| POX05515 | hypothetical protein | NA | NA | IPR003663; Sugar/inositol transporter//<br>IPR020846; Major facilitator superfamily domain | 239.003 | 53.7733 | -2.152067929 | Down | 0.866933618 |
| POX05575 | hypothetical protein | NA | NA | IPR000250; Peptidase G1                                                                    | 5533.42 | 112.317 | -5.622527502 | Down | 0.956006407 |
| POX05576 | hypothetical protein | NA | NA | IPR023753; FAD/NAD(P)-binding domain                                                       | 121.547 | 7.58667 | -4.001900367 | Down | 0.888200747 |
| POX05646 | hypothetical protein | NA | NA | NA                                                                                         | 59.5333 | 4.14667 | -3.84367369  | Down | 0.839028297 |
| POX05703 | hypothetical protein | NA | NA | IPR018306; Bacteriophage T5, Orf172 DNA-binding                                            | 111.863 | 12.7    | -3.138836824 | Down | 0.87104467  |
| POX05767 | hypothetical protein | NA | NA | NA                                                                                         | 5887.09 | 2047.42 | -1.523749133 | Down | 0.844171561 |
| POX05897 | hypothetical protein | NA | NA | IPR003663; Sugar/inositol transporter//<br>IPR020846; Major facilitator superfamily domain | 390.337 | 97.9067 | -1.995239986 | Down | 0.868677701 |
| POX06008 | hypothetical protein | NA | NA | IPR003663; Sugar/inositol transporter//<br>IPR020846; Major facilitator superfamily domain | 1347.05 | 475.037 | -1.503689052 | Down | 0.838441004 |
| POX06145 | hypothetical protein | NA | NA | NA                                                                                         | 197.013 | 4.69    | -5.392561538 | Down | 0.920982381 |
| POX06146 | hypothetical protein | NA | NA | NA                                                                                         | 78.6533 | 1.79333 | -5.454792331 | Down | 0.878038797 |
| POX06165 | hypothetical protein | NA | NA | NA                                                                                         | 121.543 | 22.9233 | -2.406582014 | Down | 0.853657234 |
| POX06231 | hypothetical protein | NA | NA | NA                                                                                         | 493.73  | 139.967 | -1.818639021 | Down | 0.860847126 |
| POX06317 | hypothetical protein | NA | NA | IPR010440; Lipopolysaccharide kinase                                                       | 141.483 | 20.7133 | -2.772000468 | Down | 0.872859939 |
| POX06345 | hypothetical protein | NA | NA | IPR021706; Protein of unknown function DUF2990                                             | 1443.2  | 227.15  | -2.667557365 | Down | 0.911834846 |
| POX06525 | hypothetical protein | NA | NA | NA                                                                                         | 133.167 | 41.8733 | -1.669129329 | Down | 0.812902652 |
| POX06526 | hypothetical protein | NA | NA | IPR003445; Cation transporter                                                              | 155.57  | 43.34   | -1.84379282  | Down | 0.833796049 |
| POX06527 | hypothetical protein | NA | NA | NA                                                                                         | 76.04   | 17.33   | -2.133486877 | Down | 0.812208578 |
| POX06528 | hypothetical protein | NA | NA | NA                                                                                         | 1382.3  | 159.547 | -3.115023864 | Down | 0.92329596  |
| POX06530 | hypothetical protein | NA | NA | IPR001568; Ribonuclease T2-like                                                            | 1628.44 | 447.353 | -1.864006846 | Down | 0.872450614 |
| POX06549 | hypothetical protein | NA | NA | IPR019931; LPXTG cell wall anchor domain                                                   | 146.847 | 29.7533 | -2.303187307 | Down | 0.858818295 |
| POX06595 | hypothetical protein | NA | NA | IPR001338; Hydrophobin                                                                     | 177.783 | 23.8167 | -2.900076666 | Down | 0.88499733  |

|          |                      |    |    |                                                                                               |         |         |              |      |             |
|----------|----------------------|----|----|-----------------------------------------------------------------------------------------------|---------|---------|--------------|------|-------------|
| POX06641 | hypothetical protein | NA | NA | IPR011701; Major facilitator superfamily                                                      | 73.0267 | 15.68   | -2.21949782  | Down | 0.814184019 |
| POX06730 | hypothetical protein | NA | NA | IPR032675; Leucine-rich repeat domain, L domain-like                                          | 71.36   | 13.5433 | -2.397532751 | Down | 0.820288308 |
| POX06738 | hypothetical protein | NA | NA | IPR006823; Neutral/alkaline nonlysosomal ceramidase                                           | 340.037 | 54.4067 | -2.643834976 | Down | 0.894821143 |
| POX06740 | hypothetical protein | NA | NA | NA                                                                                            | 90.05   | 19.68   | -2.193996055 | Down | 0.827246841 |
| POX06820 | hypothetical protein | NA | NA | NA                                                                                            | 7952.22 | 1535.89 | -2.372282776 | Down | 0.903897491 |
| POX06986 | hypothetical protein | NA | NA | IPR006671; Cyclin, N-terminal                                                                 | 65.53   | 12.0867 | -2.438739107 | Down | 0.815038263 |
| POX07135 | hypothetical protein | NA | NA | NA                                                                                            | 691.6   | 279.123 | -1.309035137 | Down | 0.808275494 |
| POX07269 | hypothetical protein | NA | NA | IPR005801; ADC synthase                                                                       | 60.2667 | 3.04333 | -4.307636007 | Down | 0.846129204 |
| POX07270 | hypothetical protein | NA | NA | IPR025714; Methyltransferase domain                                                           | 179.407 | 13.9067 | -3.689384939 | Down | 0.899608471 |
| POX07371 | hypothetical protein | NA | NA | IPR000209; Peptidase S8/S53 domain                                                            | 133.8   | 37.39   | -1.83935374  | Down | 0.826962093 |
| POX07428 | hypothetical protein | NA | NA | IPR004648; Tetrapeptide transporter, OPT1/isp4                                                | 414.11  | 121.93  | -1.763960907 | Down | 0.853568251 |
| POX07457 | hypothetical protein | NA | NA | NA                                                                                            | 797.47  | 51.3033 | -3.958305777 | Down | 0.931251112 |
| POX07584 | hypothetical protein | NA | NA | IPR006045; Cupin 1                                                                            | 125.407 | 35.78   | -1.809388752 | Down | 0.821409503 |
| POX07644 | hypothetical protein | NA | NA | IPR001128; Cytochrome P450                                                                    | 280.283 | 63.4567 | -2.143042314 | Down | 0.870457377 |
| POX07646 | hypothetical protein | NA | NA | NA                                                                                            | 484.287 | 90.01   | -2.427704086 | Down | 0.894305036 |
| POX07666 | hypothetical protein | NA | NA | IPR011701; Major facilitator superfamily//<br>IPR020846; Major facilitator superfamily domain | 89.34   | 24.55   | -1.86358323  | Down | 0.80626446  |
| POX07688 | hypothetical protein | NA | NA | NA                                                                                            | 373.27  | 125.3   | -1.574833148 | Down | 0.833279943 |
| POX07889 | hypothetical protein | NA | NA | IPR002938; FAD-binding domain                                                                 | 213.533 | 62.7033 | -1.767847253 | Down | 0.838796939 |
| POX07903 | hypothetical protein | NA | NA | IPR016191; Ribonuclease/ribotoxin                                                             | 42.8367 | 3.33    | -3.685252139 | Down | 0.806727176 |
| POX08132 | hypothetical protein | NA | NA | IPR016509; Membrane fusion mating protein FIG1                                                | 144.697 | 44.0633 | -1.715381145 | Down | 0.821195942 |
| POX08136 | hypothetical protein | NA | NA | IPR001466; Beta-lactamase-related                                                             | 181.01  | 32.6433 | -2.471209113 | Down | 0.872272646 |
| POX08190 | hypothetical protein | NA | NA | IPR008928; Six-hairpin glycosidase-like                                                       | 239.317 | 27.4167 | -3.12579579  | Down | 0.899768642 |
| POX08194 | hypothetical protein | NA | NA | IPR009291; Vacuolar protein sorting-associated protein 62                                     | 512.41  | 88.0933 | -2.540193882 | Down | 0.899644065 |
| POX08305 | hypothetical protein | NA | NA | IPR004813; Oligopeptide transporter, OPT superfamily                                          | 63.3967 | 9.58667 | -2.725305812 | Down | 0.822495106 |

|          |                      |       |    |                                                                                            |         |         |              |      |             |
|----------|----------------------|-------|----|--------------------------------------------------------------------------------------------|---------|---------|--------------|------|-------------|
| POX08371 | hypothetical protein | NA    | NA | IPR000209; Peptidase S8/S53 domain                                                         | 186.45  | 16.53   | -3.495630167 | Down | 0.898611853 |
| POX08486 | hypothetical protein | NA    | NA | NA                                                                                         | 820.68  | 336.397 | -1.286656385 | Down | 0.80697633  |
| POX08497 | hypothetical protein | NA    | NA | NA                                                                                         | 207.187 | 57.34   | -1.853317353 | Down | 0.843922406 |
| POX08698 | hypothetical protein | NA    | NA | IPR001077; O-methyltransferase, family 2                                                   | 49.3867 | 7.23333 | -2.771389056 | Down | 0.801583912 |
| POX08783 | hypothetical protein | NA    | NA | IPR003663; Sugar/inositol transporter//<br>IPR020846; Major facilitator superfamily domain | 219.06  | 14.9867 | -3.869574635 | Down | 0.907990746 |
| POX08891 | hypothetical protein | NA    | NA | IPR003663; Sugar/inositol transporter//<br>IPR020846; Major facilitator superfamily domain | 86.4467 | 16.5467 | -2.385269721 | Down | 0.83340452  |
| POX09258 | hypothetical protein | GH127 | NA | IPR008928; Six-hairpin glycosidase-like                                                    | 147.01  | 32.3767 | -2.182887928 | Down | 0.853016551 |
| POX09299 | hypothetical protein | NA    | NA | IPR005592; Mono-/di-acylglycerol lipase, N-terminal                                        | 425.403 | 12.1967 | -5.124272518 | Down | 0.936821498 |
| POX09301 | hypothetical protein | NA    | NA | NA                                                                                         | 548.073 | 113.997 | -2.265377302 | Down | 0.890069407 |
| POX09353 | hypothetical protein | CE10  | NA | IPR002018; Carboxylesterase, type B                                                        | 427.117 | 46.07   | -3.212730692 | Down | 0.914059441 |
| POX09358 | hypothetical protein | NA    | NA | IPR004045; Glutathione S-transferase, N-terminal                                           | 432.217 | 92.3967 | -2.225841994 | Down | 0.884570208 |
| POX09365 | hypothetical protein | NA    | NA | IPR011701; Major facilitator superfamily                                                   | 264.783 | 84.0367 | -1.655721472 | Down | 0.835468945 |
| POX09814 | hypothetical protein | NA    | NA | NA                                                                                         | 93.1033 | 5.50667 | -4.079581635 | Down | 0.873803168 |
| POX09819 | hypothetical protein | NA    | NA | IPR027417; P-loop containing nucleoside triphosphate hydrolase                             | 225.017 | 29.9433 | -2.909725126 | Down | 0.892489767 |
| POX09821 | hypothetical protein | NA    | NA | IPR002921; Fungal lipase-like domain                                                       | 869.377 | 22.5167 | -5.270916201 | Down | 0.945844456 |
| POX09822 | hypothetical protein | NA    | NA | IPR007312; Phosphoesterase                                                                 | 2027.65 | 486.697 | -2.058711474 | Down | 0.885566827 |
| POX09829 | hypothetical protein | NA    | NA | NA                                                                                         | 159.813 | 12.3333 | -3.695753103 | Down | 0.89555081  |
| POX09561 | hypothetical protein | NA    | NA | NA                                                                                         | 98.1767 | 14.86   | -2.723946069 | Down | 0.8527496   |
| POX09563 | hypothetical protein | NA    | NA | NA                                                                                         | 124.703 | 34.5267 | -1.852717066 | Down | 0.824328172 |
| POX09580 | hypothetical protein | NA    | NA | NA                                                                                         | 70.5267 | 3.53    | -4.320428766 | Down | 0.858675921 |
| POX09666 | hypothetical protein | NA    | NA | IPR002119; Histone H2A                                                                     | 2497.5  | 906.09  | -1.46275649  | Down | 0.834151984 |
| POX09743 | hypothetical protein | NA    | NA | NA                                                                                         | 26.9467 | 0.01333 | -10.98085361 | Down | 0.817120484 |
| POX09766 | hypothetical protein | NA    | NA | IPR016491; Septin                                                                          | 554.98  | 222.56  | -1.318241457 | Down | 0.807154298 |



|          |                                                  |       |                                        |                                                    |         |         |              |      |             |
|----------|--------------------------------------------------|-------|----------------------------------------|----------------------------------------------------|---------|---------|--------------|------|-------------|
| POX09786 | hypothetical protein                             | NA    | NA                                     | NA                                                 | 149.737 | 11.09   | -3.755096273 | Down | 0.893699947 |
| POX09798 | hypothetical protein                             | NA    | NA                                     | IPR021264; Protein of unknown function DUF2841     | 108.22  | 10.0667 | -3.426309192 | Down | 0.874248087 |
| POX07932 | pectin methylesterase                            | CE8   | pectin methylesterase                  | IPR000070; Pectinesterase, catalytic               | 352.8   | 119.953 | -1.556377312 | Down | 0.83142908  |
| POX08067 | pectin methylesterase                            | CE8   | pectin methylesterase                  | IPR000070; Pectinesterase, catalytic               | 72.4533 | 17.76   | -2.028420483 | Down | 0.802100018 |
| POX02484 | hypothetical protein                             | NA    | NA                                     | IPR001138; Zn(2)-C6 fungal-type DNA-binding domain | 99.75   | 28.3433 | -1.815307404 | Down | 0.810375512 |
| POX07380 | putative lysozyme                                | GH25  | NA                                     | IPR002053; Glycoside hydrolase, family 25          | 1480.75 | 249.747 | -2.567790758 | Down | 0.908684819 |
| POX06790 | rhamnogalacturonan alpha-L-rhamnopyranohydrolase | GH28  | polygalacturonase; rhamnogalacturonase | IPR000743; Glycoside hydrolase, family 28          | 103.993 | 22.57   | -2.204012721 | Down | 0.836056238 |
| POX06380 | SUN domain-containing protein                    | GH132 | NA                                     | IPR005556; SUN family                              | 136.87  | 39.3567 | -1.798126321 | Down | 0.82516462  |

CAZy, Carbohydrate-Active Enzymes; GH, Glycoside hydrolase; CE, Carbohydrate esterase; GT, Glycosyl transferase; AA, Auxiliary activities; CWDE, Plant cell wall degrading enzyme; IPR, InterPro database (<http://www.ebi.ac.uk/interpro/scan.html>).
