# Supplementary material for: Comparative genomic, transcriptomic and secretomic profiling of Penicillium oxalicum HP7-1 and its cellulase and xylanase hyper-producing mutant EU2106, and identification of two novel regulatory genes of cellulase and xylanase gene expression
Source: PubMed Central journal article supplement (PMC5035457; doi:10.1186/s13068-016-0616-9), 2016-09-23
Supplement: 13068_2016_616_MOESM6_ESM.pdf [file 13068_2016_616_MOESM6_ESM.pdf]

**Additional file 6: Table S3. List of the 240 proteins secreted by *P. oxalicum* strains HP7-1 and EU2106 when grown in medium containing wheat bran and Avicel as the carbon source.**

| Protein ID | Functional annotation           | Predicted secretion signals | Protein contents (HP7-1/EU2106) | Regulation (EU2106/HP7-1) | CWDE                                            | CAZy family            | KEGG_ID          | KEGG_First class                  | KEGG_Second class                             | KEGG_Third class                                                           |
|------------|---------------------------------|-----------------------------|---------------------------------|---------------------------|-------------------------------------------------|------------------------|------------------|-----------------------------------|-----------------------------------------------|----------------------------------------------------------------------------|
| POX08861   | acetyl xylan esterase           | Y                           | 0.193201824                     | Up                        | acetyl xylan esterase                           | CBM1;<br>CE2           | NA               | NA                                | NA                                            | NA                                                                         |
| POX03711   | acetyl xylan esterase           | Y                           | 0.655513261                     | Up                        | acetyl xylan esterase                           | CE5                    | afm:AFUA_3G00420 | Unclassified                      | Metabolism                                    | Others                                                                     |
| POX01218   | acetyl xylan esterase           | Y                           | 0.138369066                     | Up                        | acetyl xylan esterase                           | CBM1;<br>CE1           | afm:AFUA_8G06570 | Unclassified                      | Metabolism                                    | Others                                                                     |
| POX03230   | alpha-amylase                   | NA                          | 0.151833799                     | Up                        | NA                                              | GH13                   | NA               | NA                                | NA                                            | NA                                                                         |
| POX09352   | alpha-amylase<br>Amy13A         | Y                           | 0.206921407                     | Up                        | NA                                              | CBM20;<br>GH13         | pcs:Pc16g00630   | Metabolism//Organismal<br>Systems | Carbohydrate Metabolism//<br>Digestive System | Starch and sucrose<br>metabolism//Carbohydrate<br>digestion and absorption |
| POX09085   | alpha-galactosidase             | Y                           | 0.328768606                     | Up                        | alpha-galactosidase                             | CBM1;<br>GH27;<br>GH36 | NA               | NA                                | NA                                            | NA                                                                         |
| POX05540   | alpha-L-<br>arabinofuranosidase | Y                           | 0.215981799                     | Up                        | beta-xylosidase/alpha-<br>L-arabinofuranosidase | GH62                   | ang:ANI_1_108034 | Metabolism                        | Carbohydrate Metabolism                       | Amino sugar and nucleotide<br>sugar metabolism                             |
| POX06599   | alpha-L-<br>arabinofuranosidase | Y                           | 0.375481626                     | Up                        | beta-xylosidase/alpha-<br>L-arabinofuranosidase | CBM1;<br>GH62          | sco:SCO5932      | Metabolism                        | Carbohydrate Metabolism                       | Amino sugar and nucleotide<br>sugar metabolism                             |
| POX01914   | alpha-L-<br>arabinofuranosidase | Y                           | 0.32949444                      | Up                        | beta-xylosidase/alpha-<br>L-arabinofuranosidase | CBM42;<br>GH54         | ang:ANI_1_372134 | Metabolism                        | Carbohydrate Metabolism                       | Amino sugar and nucleotide<br>sugar metabolism                             |
| POX06600   | alpha-L-<br>arabinofuranosidase | Y                           | 0.878482284                     | Up                        | beta-xylosidase/alpha-<br>L-arabinofuranosidase | CBM1;<br>GH43          | afm:AFUA_2G00930 | Unclassified                      | Metabolism                                    | Others                                                                     |

|          |                                     |    |             |    |                        |        |                  |                                                                |                                                                                                                        |                                                                                                                            |
|----------|-------------------------------------|----|-------------|----|------------------------|--------|------------------|----------------------------------------------------------------|------------------------------------------------------------------------------------------------------------------------|----------------------------------------------------------------------------------------------------------------------------|
| POX06301 | alpha-mannosidase                   | Y  | 0.244732122 | Up | NA                     | GH47   | pcs:Pc16g14170   | Metabolism//<br>Metabolism// Genetic<br>Information Processing | Glycan Biosynthesis and<br>Metabolism// Glycan<br>Biosynthesis and<br>Metabolism// Folding,<br>Sorting and Degradation | N-Glycan biosynthesis //<br>Various types of N-glycan<br>biosynthesis // Protein<br>processing in endoplasmic<br>reticulum |
| POX01716 | beta-1, 3-glucanase                 | NA | 0.645715858 | Up | NA                     | GH17   | NA               | NA                                                             | NA                                                                                                                     | NA                                                                                                                         |
| POX02423 | beta-1, 3-glucanase                 | NA | 0.359901992 | Up | NA                     | GH64   | NA               | NA                                                             | NA                                                                                                                     | NA                                                                                                                         |
| POX06042 | beta-1, 3-<br>glucanosyltransferase | Y  | 0.194303023 | Up | NA                     | GH17   | pcs:Pc13g08730   | Metabolism                                                     | Carbohydrate Metabolism                                                                                                | Starch and sucrose<br>metabolism                                                                                           |
| POX09120 | beta-glucanase                      | Y  | 0.602607135 | Up | NA                     | GH16   | NA               | NA                                                             | NA                                                                                                                     | NA                                                                                                                         |
| POX03641 | beta-glucosidase                    | NA | 0.275155631 | Up | beta-glucosidase       | GH3    | pcs:Pc21g18230   | Metabolism//<br>Metabolism//<br>Metabolism                     | Carbohydrate Metabolism//<br>Metabolism of Other Amino<br>Acids// Biosynthesis of Other<br>Secondary Metabolites       | Starch and sucrose<br>metabolism // Cyanoamino<br>acid metabolism //<br>Phenylpropanoid<br>biosynthesis                    |
| POX06079 | beta-glucosidase                    | NA | 0.033276231 | Up | beta-glucosidase       | GH1    | afm:AFUA_1G14710 | Metabolism//<br>Metabolism//<br>Metabolism                     | Carbohydrate Metabolism//<br>Metabolism of Other Amino<br>Acids// Biosynthesis of Other<br>Secondary Metabolites       | Starch and sucrose<br>metabolism // Cyanoamino<br>acid metabolism //<br>Phenylpropanoid<br>biosynthesis                    |
| POX01961 | beta-mannosidase                    | NA | 0.165886776 | Up | beta-mannosidase       | GH2    | pcs:Pc21g13810   | Metabolism//Cellular<br>Processes                              | Glycan Biosynthesis and<br>Metabolism// Transport and<br>Catabolism                                                    | Other glycan degradation //<br>Lysosome                                                                                    |
| POX07573 | beta-N-<br>acetylhexosaminidase     | Y  | 0.41018228  | Up | NA                     | GH3    | afm:AFUA_4G13770 | Unclassified                                                   | Metabolism                                                                                                             | Others                                                                                                                     |
| POX07665 | beta-xylosidase                     | NA | 0.29614444  | Up | beta-xylosidase/alpha- | GH117; | afm:AFUA_8G04710 | Metabolism//                                                   | Carbohydrate Metabolism//                                                                                              | Starch and sucrose                                                                                                         |

|          |                                                                |    |             |    |                                             |           |                  |              |                         |                                                           |
|----------|----------------------------------------------------------------|----|-------------|----|---------------------------------------------|-----------|------------------|--------------|-------------------------|-----------------------------------------------------------|
|          |                                                                |    |             |    | L-arabinofuranosidase                       | GH43      |                  | Metabolism   | Carbohydrate Metabolism | metabolism // Amino sugar and nucleotide sugar metabolism |
| POX00007 | beta-xylosidase                                                | Y  | 0.692954033 | Up | beta-xylosidase/alpha-L-arabinofuranosidase | GH3; AA5  | NA               | NA           | NA                      | NA                                                        |
| POX04688 | bifunctional alpha-glucuronidase/N-acetyl beta-glucosaminidase | Y  | 0.188333321 | Up | alpha-glucuronidase                         | GH84      | NA               | NA           | NA                      | NA                                                        |
| POX02739 | carbohydrate acetyltransferase                                 | NA | 0.130505243 | Up | NA                                          | CE16      | NA               | NA           | NA                      | NA                                                        |
| POX02490 | cellobiohydrolase                                              | Y  | 0.106743285 | Up | cellobiohydrolase                           | GH7       | afm:AFUA_6G11610 | Unclassified | Metabolism              | Others                                                    |
| POX05587 | cellobiohydrolase CBHI                                         | Y  | 0.249154222 | Up | cellobiohydrolase                           | CBM1; GH7 | afm:AFUA_6G11610 | Unclassified | Metabolism              | Others                                                    |
| POX04786 | cellobiohydrolase Cel6A                                        | Y  | 0.229568081 | Up | cellobiohydrolase                           | CBM1; GH6 | afm:AFUA_3G01910 | Unclassified | Metabolism              | Others                                                    |
| POX08897 | cellulose monoxygenase                                         | Y  | 0.199367758 | Up | cellulose monoxygenase                      | CBM1; AA9 | afm:AFUA_3G03870 | Metabolism   | Carbohydrate Metabolism | Starch and sucrose metabolism                             |
| POX02308 | cellulose monoxygenase Cel61A                                  | NA | 0.130058235 | Up | cellulose monoxygenase                      | AA9       | afm:AFUA_1G12560 | Unclassified | Metabolism              | Others                                                    |
| POX06051 | cellodextrin transporter cdt-c                                 | NA | 0.21323944  | Up | NA                                          | NA        | NA               | NA           | NA                      | NA                                                        |
| POX01329 | chitin deacetylase                                             | NA | 0.194671836 | Up | NA                                          | CE4       | NA               | NA           | NA                      | NA                                                        |
| POX06241 | chitin glucanoyltransferase                                    | Y  | 0.311305518 | Up | NA                                          | GH16      | afm:AFUA_1G16190 | Unclassified | Metabolism              | Others                                                    |
| POX02668 | chitin                                                         | Y  | 0.685664458 | Up | NA                                          | GH16      | afm:AFUA_2G03120 | Unclassified | Metabolism              | Others                                                    |

|          |                                |    |             |    |                          |                  |                  |              |                         |                                             |
|----------|--------------------------------|----|-------------|----|--------------------------|------------------|------------------|--------------|-------------------------|---------------------------------------------|
|          | glucanoyltransferase           |    |             |    |                          |                  |                  |              |                         |                                             |
| POX01470 | chitinase                      | Y  | 0.108273306 | Up | NA                       | GH18             | NA               | NA           | NA                      | NA                                          |
| POX00089 | chitinase                      | Y  | 0.48517094  | Up | NA                       | GH18             | afm:AFUA_8G01410 | Metabolism   | Carbohydrate Metabolism | Amino sugar and nucleotide sugar metabolism |
| POX07424 | chitinase                      | NA | 0.511199241 | Up | NA                       | GH18             | NA               | NA           | NA                      | NA                                          |
| POX03021 | chitinase                      | NA | 0.491553476 | Up | NA                       | GH18             | afv:AFLA_031380  | Metabolism   | Carbohydrate Metabolism | Amino sugar and nucleotide sugar metabolism |
| POX01004 | dipeptidyl-peptidase 3         | NA | 0.669676127 | Up | NA                       | NA               | pcs:Pc22g16760   | Metabolism   | Enzyme Families         | Peptidases                                  |
| POX06959 | endo-beta-1, 3-glucanase       | Y  | 0.325828277 | Up | NA                       | GH81             | afm:AFUA_1G04260 | Unclassified | Metabolism              | Others                                      |
| POX01166 | endo-beta-1, 4-glucanase       | Y  | 0.18702696  | Up | endo-beta-1, 4-glucanase | CBM1; GH5        | act:ACLA_085250  | Metabolism   | Carbohydrate Metabolism | Starch and sucrose metabolism               |
| POX07535 | endo-beta-1, 4-glucanase       | Y  | 0.380123591 | Up | endo-beta-1, 4-glucanase | GH12             | afm:AFUA_7G06150 | Unclassified | Metabolism              | Others                                      |
| POX04137 | endo-beta-1, 4-glucanase       | NA | 0.217282765 | Up | endo-beta-1, 4-glucanase | CBM1; GH5        | pcs:Pc22g19230   | Metabolism   | Carbohydrate Metabolism | Starch and sucrose metabolism               |
| POX02740 | endo-beta-1, 4-glucanase       | Y  | 0.149162769 | Up | endo-beta-1, 4-glucanase | GH5              | nfi:NFIA_053150  | Metabolism   | Carbohydrate Metabolism | Starch and sucrose metabolism               |
| POX05571 | endo-beta-1, 4-glucanase 1     | Y  | 0.2361764   | Up | endo-beta-1, 4-glucanase | CBM1; GH7        | nfi:NFIA_047960  | Metabolism   | Carbohydrate Metabolism | Starch and sucrose metabolism               |
| POX06147 | endo-beta-1, 4-glucanase Cel5A | Y  | 0.261346967 | Up | endo-beta-1, 4-glucanase | CBM1; GH5        | NA               | NA           | NA                      | NA                                          |
| POX01896 | endo-beta-1, 4-glucanase Cel5C | Y  | 0.142513504 | Up | endo-beta-1, 4-glucanase | CBM1; CBM46; GH5 | pcs:Pc21g14410   | Metabolism   | Carbohydrate Metabolism | Starch and sucrose metabolism               |
| POX06983 | endo-beta-1, 4-                | Y  | 0.172388229 | Up | endo-beta-1, 4-          | GH12             | afm:AFUA_1G04730 | Unclassified | Metabolism              | Others                                      |

|          |                                      |    |             |    |                                           |                |                  |                            |                                                      |                                                                           |
|----------|--------------------------------------|----|-------------|----|-------------------------------------------|----------------|------------------|----------------------------|------------------------------------------------------|---------------------------------------------------------------------------|
|          | glucanase                            |    |             |    | glucanase                                 |                |                  |                            |                                                      |                                                                           |
| POX08990 | endo-beta-1, 4-xylanase              | Y  | 0.244287914 | Up | endo-beta-1, 4-xylanase                   | GH10           | pcs:Pc20g07020   | Unclassified               | Metabolism                                           | Carbohydrate metabolism                                                   |
| POX05916 | endo-beta-1, 4-xylanase              | Y  | 0.07332994  | Up | endo-beta-1, 4-xylanase                   | GH10           | NA               | NA                         | NA                                                   | NA                                                                        |
| POX00063 | endo-beta-1, 4-xylanase              | Y  | 0.14577176  | Up | endo-beta-1, 4-xylanase                   | CBM1;<br>GH10  | afm:AFUA_6G13610 | Unclassified               | Metabolism                                           | Carbohydrate metabolism                                                   |
| POX08484 | endo-beta-1, 4-xylanase              | Y  | 0.565009701 | Up | Endo-beta-1, 4-xylanase                   | CBM1;<br>GH11  | afm:AFUA_3G00470 | Unclassified               | Metabolism                                           | Carbohydrate metabolism                                                   |
| POX06601 | endo-beta-1, 4-xylanase              | Y  | 0.528570911 | Up | Endo-beta-1, 4-xylanase                   | CBM1;<br>GH30  | NA               | NA                         | NA                                                   | NA                                                                        |
| POX01480 | endo-N-acetyl-beta-d-glucosaminidase | NA | 0.383395574 | Up | NA                                        | NA             | afm:AFUA_5G03850 | Metabolism                 | Carbohydrate Metabolism                              | Amino sugar and nucleotide sugar metabolism                               |
| POX03730 | endopolygalacturonase                | Y  | 0.331527343 | Up | polygalacturonase;<br>rhamnogalacturonase | GH28           | ani:AN8327.2     | Metabolism//<br>Metabolism | Carbohydrate Metabolism//<br>Carbohydrate Metabolism | Pentose and glucuronate interconversions // Starch and sucrose metabolism |
| POX09801 | exo-beta-1, 3-galactanase            | NA | 0.080694524 | Up | NA                                        | GH43           | NA               | NA                         | NA                                                   | NA                                                                        |
| POX07201 | exo-beta-1, 3-glucanase              | Y  | 0.376557463 | Up | NA                                        | GH17           | afm:AFUA_3G00270 | Unclassified               | Metabolism                                           | Others                                                                    |
| POX00105 | exo-beta-1, 3-glucanase              | Y  | 0.262091777 | Up | NA                                        | GH55           | pcs:Pc22g01380   | Metabolism                 | Carbohydrate Metabolism                              | Starch and sucrose metabolism                                             |
| POX09137 | feruloyl esterase                    | Y  | 0.12349984  | Up | feruloyl esterase                         | CBM1;<br>CE1   | NA               | NA                         | NA                                                   | NA                                                                        |
| POX02412 | glucoamylase                         | Y  | 0.65634002  | Up | NA                                        | CBM20;<br>GH15 | nfi:NFIA_001210  | Metabolism                 | Carbohydrate Metabolism                              | Starch and sucrose metabolism                                             |
| POX01356 | glucoamylase Amy15A                  | Y  | 0.47573462  | Up | NA                                        | CBM20;<br>GH15 | afm:AFUA_2G00690 | Metabolism                 | Carbohydrate Metabolism                              | Starch and sucrose metabolism                                             |
| POX09655 | hypothetical protein                 | NA | 0.154867096 | Up | NA                                        | NA             | pcs:Pc20g08320   | Metabolism                 | Enzyme Families                                      | Peptidases                                                                |

|          |                      |    |             |    |    |    |                   |                                                                                                                      |                                                                                                                                           |                                                                                                                                                                   |
|----------|----------------------|----|-------------|----|----|----|-------------------|----------------------------------------------------------------------------------------------------------------------|-------------------------------------------------------------------------------------------------------------------------------------------|-------------------------------------------------------------------------------------------------------------------------------------------------------------------|
| POX00645 | hypothetical protein | NA | 0.014904063 | Up | NA | NA | NA                | NA                                                                                                                   | NA                                                                                                                                        | NA                                                                                                                                                                |
| POX01338 | hypothetical protein | NA | 0.032753727 | Up | NA | NA | afm:AFUA_5G09230  | Metabolism                                                                                                           | Carbohydrate Metabolism                                                                                                                   | Pentose phosphate pathway                                                                                                                                         |
| POX07330 | hypothetical protein | NA | 0.124747649 | Up | NA | NA | pcs:Pc20g15010    | Cellular Processes                                                                                                   | Transport and Catabolism                                                                                                                  | Peroxisome                                                                                                                                                        |
| POX07408 | hypothetical protein | NA | 0.12697581  | Up | NA | NA | afm:AFUA_2G15430  | Unclassified                                                                                                         | Metabolism                                                                                                                                | Others                                                                                                                                                            |
| POX01834 | hypothetical protein | NA | 0.053238668 | Up | NA | NA | pcs:Pc21g15240    | Metabolism//<br>Metabolism// Human<br>Diseases                                                                       | Metabolism of Terpenoids<br>and Polyketides//<br>Metabolism of Terpenoids<br>and Polyketides// Infectious<br>Diseases                     | Prenyltransferases //<br>Terpenoid backbone<br>biosynthesis//Influenza A                                                                                          |
| POX09012 | hypothetical protein | NA | 0.171994975 | Up | NA | NA | ang:ANI_1_1206064 | Metabolism//<br>Metabolism//<br>Metabolism//<br>Metabolism//<br>Metabolism                                           | Carbohydrate Metabolism//<br>Carbohydrate Metabolism//<br>Carbohydrate Metabolism//<br>Carbohydrate Metabolism//<br>Amino Acid Metabolism | Glycolysis//Gluconeogenesis<br>//Citrate cycle (TCA cycle)//<br>Pyruvate metabolism//<br>Butanoate metabolism//<br>Valine, leucine and<br>isoleucine biosynthesis |
| POX02340 | hypothetical protein | NA | 0.027619375 | Up | NA | NA | pcs:Pc13g07790    | Metabolism//<br>Metabolism//<br>Metabolism                                                                           | Carbohydrate Metabolism//<br>Amino Acid Metabolism//<br>Amino Acid Metabolism                                                             | Butanoate metabolism //<br>Alanine, aspartate and<br>glutamate metabolism //<br>Tyrosine metabolism                                                               |
| POX09399 | hypothetical protein | NA | 0.050060818 | Up | NA | NA | ani:AN6563.2      | Genetic Information<br>Processing                                                                                    | Translation                                                                                                                               | Translation factors                                                                                                                                               |
| POX00588 | hypothetical protein | NA | 0.075428005 | Up | NA | NA | pcs:Pc22g02800    | Genetic Information<br>Processing// Genetic<br>Information Processing//<br>Environmental<br>Information Processing// | Folding, Sorting and<br>Degradation// Folding,<br>Sorting and Degradation//<br>Signaling Molecules and<br>Interaction// Transport and     | Chaperones and folding<br>catalysts // Protein<br>processing in endoplasmic<br>reticulum // Glycan bindng<br>proteins // Phagosome //                             |

|          |                      |    |             |    |    |    |                  |                                                         |                                                                         |                                                                       |
|----------|----------------------|----|-------------|----|----|----|------------------|---------------------------------------------------------|-------------------------------------------------------------------------|-----------------------------------------------------------------------|
|          |                      |    |             |    |    |    |                  | Cellular Processes//<br>Organismal Systems              | Catabolism// Immune System                                              | Antigen processing and<br>presentation                                |
| POX05184 | hypothetical protein | Y  | 0.105330594 | Up | NA | NA | NA               | NA                                                      | NA                                                                      | NA                                                                    |
| POX04189 | hypothetical protein | NA | 0.108168472 | Up | NA | NA | act:ACLA_046680  | Metabolism//<br>Metabolism                              | Amino Acid Metabolism//<br>Metabolism of Other Amino<br>Acids           | Cysteine and methionine<br>metabolism //<br>Selenocompound metabolism |
| POX00862 | hypothetical protein | NA | 0.123494678 | Up | NA | NA | pcs:Pc12g09030   | Metabolism//<br>Metabolism                              | Amino Acid Metabolism//<br>Xenobiotics Biodegradation<br>and Metabolism | Tyrosine metabolism //<br>Styrene degradation                         |
| POX05099 | hypothetical protein | NA | 0.185626264 | Up | NA | NA | NA               | NA                                                      | NA                                                                      | NA                                                                    |
| POX05553 | hypothetical protein | NA | 0.162283987 | Up | NA | NA | act:ACLA_065100  | Metabolism//<br>Environmental<br>Information Processing | Carbohydrate Metabolism//<br>Signal Transduction                        | Pyruvate metabolism // Two-<br>component system                       |
| POX00551 | hypothetical protein | NA | 0.107094346 | Up | NA | NA | pcs:Pc22g04680   | Cellular Processes//<br>Human Diseases                  | Transport and Catabolism//<br>Neurodegenerative Diseases                | Peroxisome // Huntington's<br>disease                                 |
| POX04212 | hypothetical protein | Y  | 0.381806907 | Up | NA | NA | NA               | NA                                                      | NA                                                                      | NA                                                                    |
| POX00861 | hypothetical protein | NA | 0.096277151 | Up | NA | NA | afm:AFUA_2G04220 | Metabolism//<br>Metabolism                              | Amino Acid Metabolism//<br>Xenobiotics Biodegradation<br>and Metabolism | Tyrosine metabolism //<br>Styrene degradation                         |
| POX05221 | hypothetical protein | NA | 0.192558557 | Up | NA | NA | cim:CIMG_09126   | Genetic Information<br>Processing                       | Folding, Sorting and<br>Degradation                                     | Chaperones and folding<br>catalysts                                   |
| POX02628 | hypothetical protein | Y  | 0.313512237 | Up | NA | NA | afm:AFUA_2G03510 | Metabolism                                              | Enzyme Families                                                         | Peptidases                                                            |
| POX07816 | hypothetical protein | NA | 0.084479206 | Up | NA | NA | pcs:Pc22g17810   | Unclassified                                            | Poorly Characterized                                                    | Function unknown                                                      |
| POX09026 | hypothetical protein | NA | 0.117043329 | Up | NA | NA | pcs:Pc22g11870   | Metabolism                                              | Amino Acid Metabolism                                                   | Tryptophan metabolism                                                 |
| POX07127 | hypothetical protein | NA | 0.136176001 | Up | NA | NA | nfi:NFIA_021660  | Metabolism                                              | Carbohydrate Metabolism                                                 | Pentose phosphate pathway                                             |
| POX01238 | hypothetical protein | NA | 0.085296724 | Up | NA | NA | pcs:Pc12g07100   | Metabolism//                                            | Carbohydrate Metabolism//                                               | Glycolysis//                                                          |

|          |                      |    |             |    |    |     |                |                                                                                                            |                                                                                                                                                                                                                                                                                             |                                                                                                                                                                                                                                                                 |
|----------|----------------------|----|-------------|----|----|-----|----------------|------------------------------------------------------------------------------------------------------------|---------------------------------------------------------------------------------------------------------------------------------------------------------------------------------------------------------------------------------------------------------------------------------------------|-----------------------------------------------------------------------------------------------------------------------------------------------------------------------------------------------------------------------------------------------------------------|
|          |                      |    |             |    |    |     |                | Metabolism//<br>Metabolism//<br>Metabolism//<br>Metabolism//<br>Metabolism//<br>Metabolism//<br>Metabolism | Lipid Metabolism//Amino<br>Acid Metabolism//<br>Metabolism of Cofactors and<br>Vitamins//Xenobiotics<br>Biodegradation and<br>Metabolism//Xenobiotics<br>Biodegradation and<br>Metabolism//Xenobiotics<br>Biodegradation and<br>Metabolism//Xenobiotics<br>Biodegradation and<br>Metabolism | Gluconeogenesis//Fatty acid<br>metabolism//Tyrosine<br>metabolism//Retinol<br>metabolism//Chloroalkane<br>and chloroalkene<br>degradation//Naphthalene<br>degradation//Metabolism of<br>xenobiotics by cytochrome<br>P450//Drug metabolism -<br>cytochrome P450 |
| POX08322 | hypothetical protein | NA | 0.138983995 | Up | NA | NA  | pcs:Pc20g07230 | Metabolism                                                                                                 | Energy Metabolism                                                                                                                                                                                                                                                                           | Oxidative phosphorylation                                                                                                                                                                                                                                       |
| POX00147 | hypothetical protein | NA | 0.146485996 | Up | NA | NA  | pcs:Pc22g02000 | Metabolism//<br>Metabolism//<br>Metabolism                                                                 | Carbohydrate Metabolism//<br>Carbohydrate Metabolism//<br>Energy Metabolism                                                                                                                                                                                                                 | Citrate cycle (TCA cycle) //<br>Glyoxylate and dicarboxylate<br>metabolism // Carbon<br>fixation pathways in<br>prokaryotes                                                                                                                                     |
| POX04943 | hypothetical protein | NA | 0.144221553 | Up | NA | NA  | pcs:Pc21g10100 | Metabolism//<br>Metabolism//<br>Metabolism                                                                 | Metabolism of Other Amino<br>Acids// Xenobiotics<br>Biodegradation and<br>Metabolism// Xenobiotics<br>Biodegradation and<br>Metabolism                                                                                                                                                      | Glutathione metabolism //<br>Metabolism of xenobiotics<br>by cytochrome P450 // Drug<br>metabolism - cytochrome<br>P450                                                                                                                                         |
| POX04910 | hypothetical protein | NA | 0.238054172 | Up | NA | AA2 | pcs:Pc12g13740 | Metabolism//<br>Metabolism//                                                                               | Energy Metabolism// Amino<br>Acid Metabolism// Amino                                                                                                                                                                                                                                        | Methane metabolism //<br>Phenylalanine metabolism //                                                                                                                                                                                                            |



|          |                      |    |             |    |    |    |                |                                                                                                                                                                                                                                                                                                                                                                                      |                                                                                                                                                                                                                                                                                                                             |                                                                                                                                                                                                                                                                                                             |
|----------|----------------------|----|-------------|----|----|----|----------------|--------------------------------------------------------------------------------------------------------------------------------------------------------------------------------------------------------------------------------------------------------------------------------------------------------------------------------------------------------------------------------------|-----------------------------------------------------------------------------------------------------------------------------------------------------------------------------------------------------------------------------------------------------------------------------------------------------------------------------|-------------------------------------------------------------------------------------------------------------------------------------------------------------------------------------------------------------------------------------------------------------------------------------------------------------|
|          |                      |    |             |    |    |    |                | Metabolism//<br>Metabolism                                                                                                                                                                                                                                                                                                                                                           | Acid Metabolism//<br>Biosynthesis of Other<br>Secondary Metabolites                                                                                                                                                                                                                                                         | Tryptophan metabolism //<br>Phenylpropanoid<br>biosynthesis                                                                                                                                                                                                                                                 |
| POX08673 | hypothetical protein | NA | 0.1598279   | Up | NA | NA | pcs:Pc20g01610 | Metabolism//<br>Metabolism//<br>Metabolism//<br>Metabolism                                                                                                                                                                                                                                                                                                                           | Carbohydrate Metabolism//<br>Carbohydrate Metabolism//<br>Carbohydrate Metabolism//<br>Energy Metabolism                                                                                                                                                                                                                    | Citrate cycle (TCA cycle) //<br>Pyruvate metabolism //<br>Glyoxylate and dicarboxylate<br>metabolism // Carbon<br>fixation in photosynthetic<br>organisms                                                                                                                                                   |
| POX08949 | hypothetical protein | NA | 0.148501885 | Up | NA | NA | pcs:Pc22g11240 | Genetic Information<br>Processing// Genetic<br>Information Processing//<br>Genetic Information<br>Processing// Genetic<br>Information Processing//<br>Genetic Information<br>Processing// Genetic<br>Information Processing//<br>Environmental<br>Information Processing//<br>Cellular Processes//<br>Organismal Systems//<br>Human Diseases//<br>Human Diseases//<br>Human Diseases | Transcription//<br>Transcription// Translation//<br>Folding, Sorting and<br>Degradation// Folding,<br>Sorting and Degradation//<br>Folding, Sorting and<br>Degradation// Signal<br>Transduction// Transport and<br>Catabolism// Immune<br>System// Infectious<br>Diseases// Infectious<br>Diseases// Infectious<br>Diseases | Spliceosome // Spliceosome<br>// Ribosome Biogenesis //<br>Chaperones and folding<br>catalysts // Protein<br>processing in endoplasmic<br>reticulum // Proteasome //<br>MAPK signaling pathway //<br>Endocytosis // Antigen<br>processing and presentation<br>// Measles // Influenza A //<br>Toxoplasmosis |
| POX00770 | hypothetical protein | NA | 0.103087459 | Up | NA | NA | pcs:Pc12g08900 | Metabolism//                                                                                                                                                                                                                                                                                                                                                                         | Amino Acid Metabolism//                                                                                                                                                                                                                                                                                                     | Alanine, aspartate and                                                                                                                                                                                                                                                                                      |

|          |                      |    |             |    |                   |          |                  |                                                                                                               |                                                                                                                                                                                |                                                                                                                                                                     |
|----------|----------------------|----|-------------|----|-------------------|----------|------------------|---------------------------------------------------------------------------------------------------------------|--------------------------------------------------------------------------------------------------------------------------------------------------------------------------------|---------------------------------------------------------------------------------------------------------------------------------------------------------------------|
|          |                      |    |             |    |                   |          |                  | Metabolism                                                                                                    | Amino Acid Metabolism                                                                                                                                                          | glutamate metabolism // Arginine and proline metabolism                                                                                                             |
| POX07663 | hypothetical protein | NA | 0.17139734  | Up | NA                | CE10;CE1 | NA               | NA                                                                                                            | NA                                                                                                                                                                             | NA                                                                                                                                                                  |
| POX00727 | hypothetical protein | NA | 0.137005665 | Up | feruloyl esterase | NA       | pcs:Pc12g08300   | Unclassified                                                                                                  | Metabolism                                                                                                                                                                     | Others                                                                                                                                                              |
| POX07023 | hypothetical protein | NA | 0.305729415 | Up | NA                | NA       | mgr:MGG_03648    | Metabolism//<br>Metabolism//<br>Metabolism//<br>Metabolism//<br>Metabolism                                    | Carbohydrate Metabolism//<br>Carbohydrate Metabolism//<br>Lipid Metabolism//<br>Xenobiotics Biodegradation<br>and Metabolism//<br>Xenobiotics Biodegradation<br>and Metabolism | Fructose and mannose<br>metabolism//Butanoate<br>metabolism//Linoleic acid<br>metabolism//Chloroalkane<br>and chloroalkene<br>degradation//Bisphenol<br>degradation |
| POX02372 | hypothetical protein | NA | 0.138069678 | Up | NA                | NA       | NA               | NA                                                                                                            | NA                                                                                                                                                                             | NA                                                                                                                                                                  |
| POX00913 | hypothetical protein | NA | 0.184088182 | Up | NA                | NA       | NA               | NA                                                                                                            | NA                                                                                                                                                                             | NA                                                                                                                                                                  |
| POX09390 | hypothetical protein | NA | 0.140650683 | Up | NA                | NA       | NA               | NA                                                                                                            | NA                                                                                                                                                                             | NA                                                                                                                                                                  |
| POX00530 | hypothetical protein | NA | 0.168161276 | Up | NA                | NA       | NA               | NA                                                                                                            | NA                                                                                                                                                                             | NA                                                                                                                                                                  |
| POX03582 | hypothetical protein | NA | 0.205570458 | Up | NA                | NA       | ang:ANI_1_642104 | Genetic Information<br>Processing// Genetic<br>Information Processing//<br>Human Diseases//<br>Human Diseases | Folding, Sorting and<br>Degradation// Folding,<br>Sorting and Degradation//<br>Metabolic Diseases//<br>Infectious Diseases                                                     | Chaperones and folding<br>catalysts // RNA degradation<br>// Type I diabetes mellitus //<br>Tuberculosis                                                            |
| POX04116 | hypothetical protein | NA | 0.280336862 | Up | NA                | NA       | afv:AFLA_044820  | Metabolism//<br>Metabolism//<br>Metabolism//<br>Metabolism                                                    | Carbohydrate Metabolism//<br>Carbohydrate Metabolism//<br>Carbohydrate Metabolism//<br>Carbohydrate Metabolism                                                                 | Glycolysis / Gluconeogenesis<br>// Pentose phosphate pathway<br>// Starch and sucrose<br>metabolism // Amino sugar<br>and nucleotide sugar                          |

|          |                      |    |             |    |    |    |                  |                                                                            |                                                                                                                                                    |                                                                                                                                                                                           |
|----------|----------------------|----|-------------|----|----|----|------------------|----------------------------------------------------------------------------|----------------------------------------------------------------------------------------------------------------------------------------------------|-------------------------------------------------------------------------------------------------------------------------------------------------------------------------------------------|
|          |                      |    |             |    |    |    |                  |                                                                            |                                                                                                                                                    | metabolism                                                                                                                                                                                |
| POX03509 | hypothetical protein | NA | 0.17947271  | Up | NA | NA | pcs:Pc21g08590   | Metabolism                                                                 | Carbohydrate Metabolism                                                                                                                            | Pyruvate metabolism                                                                                                                                                                       |
| POX07066 | hypothetical protein | NA | 0.161014772 | Up | NA | NA | afv:AFLA_030160  | Metabolism                                                                 | Metabolism of Cofactors and Vitamins                                                                                                               | Porphyrin and chlorophyll metabolism                                                                                                                                                      |
| POX04040 | hypothetical protein | NA | 0.227890106 | Up | NA | NA | NA               | NA                                                                         | NA                                                                                                                                                 | NA                                                                                                                                                                                        |
| POX08090 | hypothetical protein | NA | 0.271073805 | Up | NA | NA | afm:AFUA_2G02100 | Metabolism//<br>Metabolism//<br>Metabolism//<br>Metabolism//<br>Metabolism | Carbohydrate Metabolism//<br>Carbohydrate Metabolism//<br>Carbohydrate Metabolism//<br>Amino Acid Metabolism//<br>Amino Acid Metabolism            | Glycolysis / Gluconeogenesis<br>// Citrate cycle (TCA cycle)<br>// Pyruvate metabolism //<br>Glycine, serine and threonine<br>metabolism // Valine, leucine<br>and isoleucine degradation |
| POX00170 | hypothetical protein | NA | 0.159530211 | Up | NA | NA | afm:AFUA_6G12740 | Metabolism//<br>Metabolism//<br>Metabolism                                 | Biosynthesis of Other<br>Secondary Metabolites//<br>Xenobiotics Biodegradation<br>and Metabolism//<br>Xenobiotics Biodegradation<br>and Metabolism | Tropane, piperidine and<br>pyridine alkaloid<br>biosynthesis//<br>Aminobenzoate degradation<br>//Bisphenol degradation                                                                    |
| POX08331 | hypothetical protein | NA | 0.226682755 | Up | NA | NA | pcs:Pc20g06940   | Metabolism                                                                 | Enzyme Families                                                                                                                                    | Peptidases                                                                                                                                                                                |
| POX07194 | hypothetical protein | NA | 0.488296191 | Up | NA | NA | afv:AFLA_134120  | Metabolism                                                                 | Nucleotide Metabolism                                                                                                                              | Pyrimidine metabolism                                                                                                                                                                     |
| POX01443 | hypothetical protein | NA | 0.565465358 | Up | NA | NA | pcs:Pc21g15880   | Metabolism//<br>Metabolism                                                 | Nucleotide Metabolism//<br>Nucleotide Metabolism                                                                                                   | Purine metabolism //<br>Pyrimidine metabolism                                                                                                                                             |
| POX05577 | hypothetical protein | NA | 0.27384223  | Up | NA | NA | NA               | NA                                                                         | NA                                                                                                                                                 | NA                                                                                                                                                                                        |
| POX03078 | hypothetical protein | NA | 0.385668192 | Up | NA | NA | pcs:Pc18g01570   | Metabolism                                                                 | Enzyme Families                                                                                                                                    | Peptidases                                                                                                                                                                                |
| POX05098 | hypothetical protein | NA | 0.432294618 | Up | NA | NA | NA               | NA                                                                         | NA                                                                                                                                                 | NA                                                                                                                                                                                        |
| POX08126 | hypothetical protein | NA | 0.631443967 | Up | NA | NA | nfi:NFIA_068150  | Metabolism//<br>Metabolism                                                 | Amino Acid Metabolism//<br>Metabolism of Cofactors and                                                                                             | Glycine, serine and threonine<br>metabolism // Vitamin B6                                                                                                                                 |

|          |                      |    |             |    |    |    |                       |                                                                                           |                                                                                                                                             |                                                                                                                                               |
|----------|----------------------|----|-------------|----|----|----|-----------------------|-------------------------------------------------------------------------------------------|---------------------------------------------------------------------------------------------------------------------------------------------|-----------------------------------------------------------------------------------------------------------------------------------------------|
|          |                      |    |             |    |    |    |                       |                                                                                           | Vitamins                                                                                                                                    | metabolism                                                                                                                                    |
| POX08200 | hypothetical protein | NA | 0.264794598 | Up | NA | NA | cpw:CPC735_01548<br>0 | Genetic Information<br>Processing                                                         | Folding, Sorting and<br>Degradation                                                                                                         | Chaperones and folding<br>catalysts                                                                                                           |
| POX02457 | hypothetical protein | NA | 0.361080198 | Up | NA | NA | pcs:Pc18g03470        | Metabolism                                                                                | Enzyme Families                                                                                                                             | Peptidases                                                                                                                                    |
| POX03157 | hypothetical protein | NA | 0.443354566 | Up | NA | NA | aor:AOR_1_1206154     | Metabolism                                                                                | Nucleotide Metabolism                                                                                                                       | Purine metabolism                                                                                                                             |
| POX03806 | hypothetical protein | NA | 0.329265044 | Up | NA | NA | NA                    | NA                                                                                        | NA                                                                                                                                          | NA                                                                                                                                            |
| POX04781 | hypothetical protein | Y  | 0.453780758 | Up | NA | NA | NA                    | NA                                                                                        | NA                                                                                                                                          | NA                                                                                                                                            |
| POX02119 | hypothetical protein | NA | 0.443960265 | Up | NA | NA | NA                    | NA                                                                                        | NA                                                                                                                                          | NA                                                                                                                                            |
| POX04093 | hypothetical protein | NA | 0.272080435 | Up | NA | NA | pcs:Pc22g19990        | Genetic Information<br>Processing// Genetic<br>Information Processing//<br>Human Diseases | Folding, Sorting and<br>Degradation// Folding,<br>Sorting and Degradation//<br>Infectious Diseases                                          | Chaperones and folding<br>catalysts // RNA degradation<br>// Tuberculosis                                                                     |
| POX08821 | hypothetical protein | Y  | 0.312153428 | Up | NA | NA | NA                    | NA                                                                                        | NA                                                                                                                                          | NA                                                                                                                                            |
| POX08978 | hypothetical protein | NA | 0.416033758 | Up | NA | NA | afm:AFUA_1G07200      | Metabolism                                                                                | Carbohydrate Metabolism                                                                                                                     | Pyruvate metabolism                                                                                                                           |
| POX01339 | hypothetical protein | NA | 0.292720326 | Up | NA | NA | ang:ANI_1_470064      | Cellular Processes//<br>Human Diseases//<br>Human Diseases//<br>Human Diseases            | Transport and Catabolism//<br>Neurodegenerative<br>Diseases//<br>Neurodegenerative<br>Diseases//<br>Neurodegenerative Diseases              | Peroxisome // Amyotrophic<br>lateral sclerosis (ALS) //<br>Huntington's disease // Prion<br>diseases                                          |
| POX08626 | hypothetical protein | NA | 0.548265359 | Up | NA | NA | pcs:Pc20g01390        | Metabolism                                                                                | Enzyme Families                                                                                                                             | Peptidases                                                                                                                                    |
| POX00441 | hypothetical protein | NA | 0.27056641  | Up | NA | NA | ani:AN5604.2          | Metabolism//<br>Metabolism//<br>Metabolism//<br>Metabolism//<br>Metabolism//              | Carbohydrate Metabolism//<br>Carbohydrate Metabolism//<br>Carbohydrate Metabolism//<br>Energy Metabolism// Energy<br>Metabolism// Endocrine | Glycolysis / Gluconeogenesis<br>// Pentose phosphate pathway<br>// Fructose and mannose<br>metabolism // Carbon<br>fixation in photosynthetic |

|          |                      |    |             |    |    |      |                  |                                                                                    |                                                                                                                                  |                                                                                                                                                                             |
|----------|----------------------|----|-------------|----|----|------|------------------|------------------------------------------------------------------------------------|----------------------------------------------------------------------------------------------------------------------------------|-----------------------------------------------------------------------------------------------------------------------------------------------------------------------------|
|          |                      |    |             |    |    |      |                  | Organismal Systems                                                                 | System                                                                                                                           | organisms // Methane metabolism // Insulin signaling pathway                                                                                                                |
| POX02610 | hypothetical protein | Y  | 0.351682401 | Up | NA | NA   | NA               | NA                                                                                 | NA                                                                                                                               | NA                                                                                                                                                                          |
| POX03835 | hypothetical protein | NA | 0.318077575 | Up | NA | NA   | pcs:Pc13g05440   | Metabolism                                                                         | Enzyme Families                                                                                                                  | Peptidases                                                                                                                                                                  |
| POX03389 | hypothetical protein | Y  | 0.526631478 | Up | NA | NA   | NA               | NA                                                                                 | NA                                                                                                                               | NA                                                                                                                                                                          |
| POX00044 | hypothetical protein | Y  | 0.476120777 | Up | NA | NA   | NA               | NA                                                                                 | NA                                                                                                                               | NA                                                                                                                                                                          |
| POX05561 | hypothetical protein | NA | 0.385064064 | Up | NA | NA   | pcs:Pc21g20440   | Metabolism//<br>Metabolism                                                         | Carbohydrate Metabolism//<br>Energy Metabolism                                                                                   | Pentose phosphate pathway //<br>Carbon fixation in<br>photosynthetic organisms                                                                                              |
| POX05122 | hypothetical protein | Y  | 0.44989899  | Up | NA | NA   | act:ACLA_015280  | Genetic Information<br>Processing// Genetic<br>Information Processing              | Folding, Sorting and<br>Degradation// Folding,<br>Sorting and Degradation                                                        | Chaperones and folding<br>catalysts // Protein<br>processing in endoplasmic<br>reticulum                                                                                    |
| POX06888 | hypothetical protein | Y  | 0.563538272 | Up | NA | CE10 | NA               | NA                                                                                 | NA                                                                                                                               | NA                                                                                                                                                                          |
| POX05260 | hypothetical protein | Y  | 0.325096634 | Up | NA | AA7  | NA               | NA                                                                                 | NA                                                                                                                               | NA                                                                                                                                                                          |
| POX08835 | hypothetical protein | NA | 0.747389517 | Up | NA | NA   | NA               | NA                                                                                 | NA                                                                                                                               | NA                                                                                                                                                                          |
| POX03409 | hypothetical protein | NA | 0.564877255 | Up | NA | NA   | NA               | NA                                                                                 | NA                                                                                                                               | NA                                                                                                                                                                          |
| POX04694 | hypothetical protein | NA | 0.295425097 | Up | NA | NA   | ang:ANI_1_146074 | Metabolism//<br>Metabolism//<br>Metabolism//<br>Metabolism// Cellular<br>Processes | Energy Metabolism// Amino<br>Acid Metabolism// Amino<br>Acid Metabolism// Amino<br>Acid Metabolism// Transport<br>and Catabolism | Methane metabolism //<br>Alanine, aspartate and<br>glutamate metabolism //<br>Glycine, serine and threonine<br>metabolism // Amino acid<br>related enzymes //<br>Peroxisome |
| POX08836 | hypothetical protein | Y  | 0.638705231 | Up | NA | NA   | afm:AFUA_4G03230 | Unclassified                                                                       | Genetic Information                                                                                                              | Translation proteins                                                                                                                                                        |

|          |                      |    |             |    |    |      |                  |                                                                  | Processing                                                                    |                                                            |
|----------|----------------------|----|-------------|----|----|------|------------------|------------------------------------------------------------------|-------------------------------------------------------------------------------|------------------------------------------------------------|
| POX06951 | hypothetical protein | Y  | 0.770925678 | Up | NA | NA   | NA               | NA                                                               | NA                                                                            | NA                                                         |
| POX03949 | hypothetical protein | NA | 0.558493053 | Up | NA | NA   | NA               | NA                                                               | NA                                                                            | NA                                                         |
| POX05014 | hypothetical protein | NA | 0.620293206 | Up | NA | NA   | NA               | NA                                                               | NA                                                                            | NA                                                         |
| POX01875 | hypothetical protein | Y  | 0.340310802 | Up | NA | NA   | afm:AFUA_5G02040 | Metabolism                                                       | Lipid Metabolism                                                              | Glycerolipid metabolism                                    |
| POX09822 | hypothetical protein | Y  | 0.661997756 | Up | NA | NA   | NA               | NA                                                               | NA                                                                            | NA                                                         |
| POX01931 | hypothetical protein | NA | 0.512631147 | Up | NA | NA   | NA               | NA                                                               | NA                                                                            | NA                                                         |
| POX08190 | hypothetical protein | Y  | 0.501979923 | Up | NA | NA   | NA               | NA                                                               | NA                                                                            | NA                                                         |
| POX05436 | hypothetical protein | NA | 0.447658508 | Up | NA | NA   | act:ACLA_075450  | Metabolism                                                       | Energy Metabolism                                                             | Nitrogen metabolism                                        |
| POX09284 | hypothetical protein | Y  | 0.555323582 | Up | NA | NA   | NA               | NA                                                               | NA                                                                            | NA                                                         |
| POX02402 | hypothetical protein | NA | 0.849157308 | Up | NA | NA   | pcs:Pc18g02900   | Metabolism                                                       | Lipid Metabolism                                                              | Glycerophospholipid metabolism                             |
| POX07371 | hypothetical protein | Y  | 0.590840294 | Up | NA | NA   | NA               | NA                                                               | NA                                                                            | NA                                                         |
| POX01059 | hypothetical protein | NA | 0.363556886 | Up | NA | NA   | NA               | NA                                                               | NA                                                                            | NA                                                         |
| POX00590 | hypothetical protein | NA | 0.492116163 | Up | NA | NA   | NA               | NA                                                               | NA                                                                            | NA                                                         |
| POX02276 | hypothetical protein | Y  | 0.583695424 | Up | NA | NA   | NA               | NA                                                               | NA                                                                            | NA                                                         |
| POX08037 | hypothetical protein | NA | 0.139367351 | Up | NA | NA   | NA               | NA                                                               | NA                                                                            | NA                                                         |
| POX03543 | hypothetical protein | NA | 0.808581871 | Up | NA | NA   | afm:AFUA_3G00310 | Metabolism                                                       | Carbohydrate Metabolism                                                       | Inositol phosphate metabolism                              |
| POX03535 | hypothetical protein | NA | 0.23937428  | Up | NA | CE12 | NA               | NA                                                               | NA                                                                            | NA                                                         |
| POX08814 | hypothetical protein | Y  | 0.667215711 | Up | NA | NA   | pcs:Pc12g14680   | Metabolism// Genetic Information Processing// Cellular Processes | Enzyme Families// Folding, Sorting and Degradation// Transport and Catabolism | Peptidases // Chaperones and folding catalysts // Lysosome |
| POX08499 | hypothetical protein | Y  | 0.171602643 | Up | NA | NA   | NA               | NA                                                               | NA                                                                            | NA                                                         |
| POX04230 | hypothetical protein | Y  | 0.334213204 | Up | NA | NA   | NA               | NA                                                               | NA                                                                            | NA                                                         |

|          |                      |    |             |    |    |       |                  |                                                                                         |                                                                                                              |                                                                                                                                                                |
|----------|----------------------|----|-------------|----|----|-------|------------------|-----------------------------------------------------------------------------------------|--------------------------------------------------------------------------------------------------------------|----------------------------------------------------------------------------------------------------------------------------------------------------------------|
| POX06153 | hypothetical protein | Y  | 0.174034808 | Up | NA | NA    | ure:UREG_00545   | Metabolism//<br>Metabolism//<br>Metabolism//<br>Environmental<br>Information Processing | Carbohydrate Metabolism//<br>Lipid Metabolism// Lipid<br>Metabolism// Signaling<br>Molecules and Interaction | Inositol phosphate<br>metabolism //<br>Glycerophospholipid<br>metabolism // Ether lipid<br>metabolism // Bacterial<br>toxins                                   |
| POX01867 | hypothetical protein | Y  | 0.089929769 | Up | NA | NA    | NA               | NA                                                                                      | NA                                                                                                           | NA                                                                                                                                                             |
| POX00144 | hypothetical protein | Y  | 0.271840884 | Up | NA | AA7   | NA               | NA                                                                                      | NA                                                                                                           | NA                                                                                                                                                             |
| POX08906 | hypothetical protein | Y  | 0.413094757 | Up | NA | NA    | NA               | NA                                                                                      | NA                                                                                                           | NA                                                                                                                                                             |
| POX09419 | hypothetical protein | Y  | 0.43562236  | Up | NA | NA    | NA               | NA                                                                                      | NA                                                                                                           | NA                                                                                                                                                             |
| POX07164 | hypothetical protein | NA | 0.680041193 | Up | NA | NA    | afv:AFLA_133950  | Metabolism//<br>Metabolism//<br>Metabolism//<br>Metabolism                              | Carbohydrate Metabolism//<br>Carbohydrate Metabolism//<br>Carbohydrate Metabolism//<br>Energy Metabolism     | Glycolysis / Gluconeogenesis<br>// Fructose and mannose<br>metabolism // Inositol<br>phosphate metabolism //<br>Carbon fixation in<br>photosynthetic organisms |
| POX05578 | hypothetical protein | Y  | 0.29293567  | Up | NA | NA    | afm:AFUA_4G13750 | Metabolism//<br>Metabolism                                                              | Amino Acid Metabolism//<br>Metabolism of Cofactors and<br>Vitamins                                           | Lysine degradation // Biotin<br>metabolism                                                                                                                     |
| POX08136 | hypothetical protein | NA | 0.174376526 | Up | NA | NA    | NA               | NA                                                                                      | NA                                                                                                           | NA                                                                                                                                                             |
| POX03395 | hypothetical protein | NA | 0.192353311 | Up | NA | NA    | NA               | NA                                                                                      | NA                                                                                                           | NA                                                                                                                                                             |
| POX00796 | hypothetical protein | NA | 0.631192578 | Up | NA | NA    | afm:AFUA_2G05000 | Metabolism//<br>Metabolism                                                              | Amino Acid Metabolism//<br>Enzyme Families                                                                   | Arginine and proline<br>metabolism // Peptidases                                                                                                               |
| POX04370 | hypothetical protein | Y  | 0.40623745  | Up | NA | NA    | NA               | NA                                                                                      | NA                                                                                                           | NA                                                                                                                                                             |
| POX07409 | hypothetical protein | Y  | 0.371877772 | Up | NA | GH131 | NA               | NA                                                                                      | NA                                                                                                           | NA                                                                                                                                                             |
| POX08885 | hypothetical protein | Y  | 0.493338206 | Up | NA | NA    | NA               | NA                                                                                      | NA                                                                                                           | NA                                                                                                                                                             |

|          |                      |    |             |    |    |      |                 |                                                                                                                                                    |                                                                                                                                                                                                                                          |                                                                                                                                                                                                                                                                                                                               |
|----------|----------------------|----|-------------|----|----|------|-----------------|----------------------------------------------------------------------------------------------------------------------------------------------------|------------------------------------------------------------------------------------------------------------------------------------------------------------------------------------------------------------------------------------------|-------------------------------------------------------------------------------------------------------------------------------------------------------------------------------------------------------------------------------------------------------------------------------------------------------------------------------|
| POX07081 | hypothetical protein | Y  | 0.095928255 | Up | NA | NA   | NA              | NA                                                                                                                                                 | NA                                                                                                                                                                                                                                       | NA                                                                                                                                                                                                                                                                                                                            |
| POX00050 | hypothetical protein | Y  | 0.286049852 | Up | NA | CE10 | NA              | NA                                                                                                                                                 | NA                                                                                                                                                                                                                                       | NA                                                                                                                                                                                                                                                                                                                            |
| POX00876 | hypothetical protein | NA | 0.626085656 | Up | NA | NA   | pcs:Pc12g09820  | Metabolism//<br>Environmental<br>Information Processing                                                                                            | Carbohydrate Metabolism//<br>Signal Transduction                                                                                                                                                                                         | Pyruvate metabolism //<br>MAPK signaling pathway -<br>yeast                                                                                                                                                                                                                                                                   |
| POX02016 | hypothetical protein | Y  | 0.44830853  | Up | NA | NA   | NA              | NA                                                                                                                                                 | NA                                                                                                                                                                                                                                       | NA                                                                                                                                                                                                                                                                                                                            |
| POX03232 | hypothetical protein | Y  | 0.6145695   | Up | NA | NA   | NA              | NA                                                                                                                                                 | NA                                                                                                                                                                                                                                       | NA                                                                                                                                                                                                                                                                                                                            |
| POX03244 | hypothetical protein | NA | 0.042175931 | Up | NA | NA   | NA              | NA                                                                                                                                                 | NA                                                                                                                                                                                                                                       | NA                                                                                                                                                                                                                                                                                                                            |
| POX03937 | hypothetical protein | NA | 0.055651683 | Up | NA | NA   | afv:AFLA_026470 | Metabolism//<br>Metabolism//<br>Metabolism//<br>Metabolism//<br>Metabolism//<br>Metabolism//<br>Metabolism//<br>Metabolism//<br>Organismal Systems | Amino Acid Metabolism//<br>Amino Acid Metabolism//<br>Digestive System | Alanine, aspartate and<br>glutamate metabolism //<br>Cysteine and methionine<br>metabolism // Arginine and<br>proline metabolism //<br>Tyrosine metabolism //<br>Phenylalanine metabolism //<br>Phenylalanine, tyrosine and<br>tryptophan biosynthesis //<br>Amino acid related enzymes<br>// Fat digestion and<br>absorption |
| POX02962 | hypothetical protein | NA | 0.155206301 | Up | NA | NA   | pcs:Pc12g16040  | Metabolism//<br>Metabolism                                                                                                                         | Carbohydrate Metabolism//<br>Energy Metabolism                                                                                                                                                                                           | Glycolysis / Gluconeogenesis<br>// Methane metabolism                                                                                                                                                                                                                                                                         |
| POX06646 | hypothetical protein | NA | 0.088847601 | Up | NA | NA   | act:ACLA_088550 | Metabolism//<br>Metabolism// Genetic<br>Information Processing                                                                                     | Carbohydrate Metabolism//<br>Energy Metabolism//<br>Folding, Sorting and<br>Degradation                                                                                                                                                  | Glycolysis / Gluconeogenesis<br>// Methane metabolism //<br>RNA degradation                                                                                                                                                                                                                                                   |



|          |                      |    |             |    |    |      |                  |                                                            |                                                                                                                                                                                                                                |                                                                                                                                                    |
|----------|----------------------|----|-------------|----|----|------|------------------|------------------------------------------------------------|--------------------------------------------------------------------------------------------------------------------------------------------------------------------------------------------------------------------------------|----------------------------------------------------------------------------------------------------------------------------------------------------|
| POX05650 | hypothetical protein | NA | 0.225754044 | Up | NA | NA   | afm:AFUA_6G10880 | Metabolism//<br>Metabolism                                 | Metabolism of Terpenoids<br>and Polyketides//<br>Xenobiotics Biodegradation<br>and Metabolism                                                                                                                                  | Geraniol degradation //<br>Naphthalene degradation                                                                                                 |
| POX02826 | hypothetical protein | Y  | 0.37839669  | Up | NA | NA   | afm:AFUA_2G01250 | Metabolism//<br>Metabolism                                 | Amino Acid Metabolism//<br>Metabolism of Cofactors and<br>Vitamins                                                                                                                                                             | Lysine degradation // Biotin<br>metabolism                                                                                                         |
| POX05715 | hypothetical protein | Y  | 0.251494142 | Up | NA | CE10 | afm:AFUA_8G04210 | Unclassified                                               | Metabolism                                                                                                                                                                                                                     | Others                                                                                                                                             |
| POX01547 | hypothetical protein | NA | 0.204086057 | Up | NA | NA   | mgr:MGG_08166    | Metabolism                                                 | Carbohydrate Metabolism                                                                                                                                                                                                        | Glyoxylate and dicarboxylate<br>metabolism                                                                                                         |
| POX02774 | hypothetical protein | NA | 0.418720504 | Up | NA | NA   | afm:AFUA_3G11920 | Metabolism//<br>Metabolism//<br>Metabolism//<br>Metabolism | Carbohydrate Metabolism//<br>Metabolism of Terpenoids<br>and Polyketides//<br>Xenobiotics Biodegradation<br>and Metabolism//<br>Xenobiotics Biodegradation<br>and Metabolism//<br>Xenobiotics Biodegradation<br>and Metabolism | Butanoate metabolism //<br>Limonene and pinene<br>degradation // Benzoate<br>degradation // Bisphenol<br>degradation // Naphthalene<br>degradation |
| POX01488 | hypothetical protein | NA | 0.513460551 | Up | NA | NA   | pcs:Pc22g13950   | Metabolism                                                 | Enzyme Families                                                                                                                                                                                                                | Peptidases                                                                                                                                         |
| POX01912 | hypothetical protein | Y  | 0.434004943 | Up | NA | NA   | NA               | NA                                                         | NA                                                                                                                                                                                                                             | NA                                                                                                                                                 |
| POX01526 | hypothetical protein | NA | 0.327841782 | Up | NA | NA   | pcs:Pc22g15910   | Metabolism                                                 | Enzyme Families                                                                                                                                                                                                                | Peptidases                                                                                                                                         |
| POX03009 | hypothetical protein | NA | 0.30300342  | Up | NA | NA   | pcs:Pc18g01490   | Metabolism                                                 | Carbohydrate Metabolism                                                                                                                                                                                                        | Glycolysis / Gluconeogenesis                                                                                                                       |
| POX01696 | hypothetical protein | NA | 0.468909064 | Up | NA | NA   | NA               | NA                                                         | NA                                                                                                                                                                                                                             | NA                                                                                                                                                 |
| POX02681 | hypothetical protein | NA | 0.214337227 | Up | NA | NA   | ure:UREG_01779   | Genetic Information<br>Processing// Genetic                | Transcription//Transcription                                                                                                                                                                                                   | Spliceosome//Spliceosome                                                                                                                           |

|          |                                                                     |    |             |    |                                        |                |                       |                                                                 |                                                                     |                                                                                 |
|----------|---------------------------------------------------------------------|----|-------------|----|----------------------------------------|----------------|-----------------------|-----------------------------------------------------------------|---------------------------------------------------------------------|---------------------------------------------------------------------------------|
|          |                                                                     |    |             |    |                                        |                |                       | Information Processing                                          |                                                                     |                                                                                 |
| POX07380 | lysozyme                                                            | Y  | 0.13982375  | Up | NA                                     | GH25           | afm:AFUA_6G10130      | Unclassified                                                    | Metabolism                                                          | Others                                                                          |
| POX01937 | mannanase                                                           | Y  | 0.279758209 | Up | beta-1, 4-mannanase                    | CBM1;<br>GH5   | NA                    | NA                                                              | NA                                                                  | NA                                                                              |
| POX04920 | pectin lyase                                                        | Y  | 0.092264282 | Up | pectate lyase; pectin lyase            | PL1            | afm:AFUA_2G00800      | Unclassified                                                    | Metabolism                                                          | Others                                                                          |
| POX07932 | pectin methylesterase                                               | Y  | 0.342956658 | Up | pectin methylesterase                  | CE8            | NA                    | NA                                                              | NA                                                                  | NA                                                                              |
| POX08761 | PHB depolymerase family esterase                                    | NA | 0.0849636   | Up | NA                                     | CBM1;<br>CE1   | afm:AFUA_4G03560      | Unclassified                                                    | Metabolism                                                          | Others                                                                          |
| POX05580 | polygalacturonase                                                   | Y  | 0.37641125  | Up | polygalacturonase; rhamnogalacturonase | GH28           | nfi:NFIA_102450       | Metabolism//<br>Metabolism                                      | Carbohydrate Metabolism//<br>Carbohydrate Metabolism                | Pentose and glucuronate interconversions // Starch and sucrose metabolism       |
| POX03893 | probable Polyubiquitin protein                                      | NA | 0.168057549 | Up | NA                                     | NA             | pcs:Pc22g12390        | Genetic Information Processing// Organismal Systems             | Folding, Sorting and Degradation// Endocrine System                 | Ubiquitin system // PPAR signaling pathway                                      |
| POX07745 | protein disulfide-isomerase                                         | Y  | 0.304684917 | Up | NA                                     | NA             | pcs:Pc21g11280        | Genetic Information Processing// Genetic Information Processing | Folding, Sorting and Degradation// Folding, Sorting and Degradation | Chaperones and folding catalysts // Protein processing in endoplasmic reticulum |
| POX08813 | starch binding domain- and chitin binding domain-containing protein | Y  | 0.169606456 | Up | NA                                     | CBM20;<br>AA13 | NA                    | NA                                                              | NA                                                                  | NA                                                                              |
| POX08485 | swollenin                                                           | Y  | 0.16793311  | Up | expansin-like protein                  | CBM1           | afm:AFUA_6G03280      | Unclassified                                                    | Metabolism                                                          | Others                                                                          |
| POX09046 | TPA: Calmodulin (CaM)                                               | NA | 0.313284837 | Up | NA                                     | NA             | cpw:CPC735_04042<br>0 | Environmental Information Processing//                          | Signal Transduction//Signal Transduction// Cell Growth              | Calcium signaling pathway // Phosphatidylinositol                               |

|          |                            |    |             |      |    |                |                  |                                                                                                                                                                                                                                                                                                                                                                                                                                                          |                                                                                                                                                                                                                                                                                                                                  |                                                                                                                                                                                                                                                                                                                                                                                                                                    |
|----------|----------------------------|----|-------------|------|----|----------------|------------------|----------------------------------------------------------------------------------------------------------------------------------------------------------------------------------------------------------------------------------------------------------------------------------------------------------------------------------------------------------------------------------------------------------------------------------------------------------|----------------------------------------------------------------------------------------------------------------------------------------------------------------------------------------------------------------------------------------------------------------------------------------------------------------------------------|------------------------------------------------------------------------------------------------------------------------------------------------------------------------------------------------------------------------------------------------------------------------------------------------------------------------------------------------------------------------------------------------------------------------------------|
|          |                            |    |             |      |    |                |                  | Environmental Information Processing// Cellular Processes// Organismal Systems// Human Diseases// Human Diseases// Human Diseases// Human Diseases | and Death// Endocrine System// Endocrine System// Endocrine System// Circulatory System// Digestive System// Digestive System// Nervous System// Nervous System// Sensory System// Sensory System// Sensory System// Environmental Adaptation// Cancers// Neurodegenerative Diseases// Infectious Diseases// Infectious Diseases | signaling system // Oocyte meiosis // Insulin signaling pathway // GnRH signaling pathway // Melanogenesis // Vascular smooth muscle contraction // Salivary secretion // Gastric acid secretion // Long-term potentiation // Neurotrophin signaling pathway // Phototransduction // Phototransduction - fly // Olfactory transduction // Plant-pathogen interaction // Glioma // Alzheimer's disease // Pertussis // Tuberculosis |
| POX00348 | TPA: Histone H 4.2         | NA | 0           | Up   | NA | NA             | afv:AFLA_137440  | Genetic Information Processing// Human Diseases                                                                                                                                                                                                                                                                                                                                                                                                          | Replication and Repair// Immune System Diseases                                                                                                                                                                                                                                                                                  | Chromosome // Systemic lupus erythematosus                                                                                                                                                                                                                                                                                                                                                                                         |
| POX03228 | alpha-1, 3-glucan synthase | NA | 1.115365578 | Down | NA | GH13; GT4; GT5 | ang:ANI_1_360084 | Metabolism                                                                                                                                                                                                                                                                                                                                                                                                                                               | Glycan Biosynthesis and Metabolism                                                                                                                                                                                                                                                                                               | Glycosyltransferases                                                                                                                                                                                                                                                                                                                                                                                                               |
| POX08017 | alpha-1, 6-mannanase       | Y  | 4.303423037 | Down | NA | GH76           | NA               | NA                                                                                                                                                                                                                                                                                                                                                                                                                                                       | NA                                                                                                                                                                                                                                                                                                                               | NA                                                                                                                                                                                                                                                                                                                                                                                                                                 |

|          |                                              |    |             |      |                           |                |                  |                                                    |                                                                                           |                                                                       |
|----------|----------------------------------------------|----|-------------|------|---------------------------|----------------|------------------|----------------------------------------------------|-------------------------------------------------------------------------------------------|-----------------------------------------------------------------------|
| POX06067 | alpha-mannosidase                            | Y  | 2.817795192 | Down | NA                        | GH92           | NA               | NA                                                 | NA                                                                                        | NA                                                                    |
| POX07083 | beta-1, 3-1, 4-glucanase                     | Y  | 1.732813547 | Down | NA                        | GH16           | afm:AFUA_1G05290 | Unclassified                                       | Metabolism                                                                                | Others                                                                |
| POX04390 | beta-1, 3-<br>glucanosyltransglycosyl<br>ase | NA | 1.196200572 | Down | NA                        | CBM43;<br>GH72 | NA               | NA                                                 | NA                                                                                        | NA                                                                    |
| POX05604 | beta-1, 3-<br>glucanosyltransglycosyl<br>ase | NA | 1.321328741 | Down | NA                        | GH72           | NA               | NA                                                 | NA                                                                                        | NA                                                                    |
| POX04626 | beta-1, 3-<br>glucanosyltransglycosyl<br>ase | Y  | 1.774401591 | Down | NA                        | CBM43;<br>GH72 | NA               | NA                                                 | NA                                                                                        | NA                                                                    |
| POX03294 | beta-1, 3-<br>glucanosyltransglycosyl<br>ase | NA | 2.262135895 | Down | NA                        | GH72           | NA               | NA                                                 | NA                                                                                        | NA                                                                    |
| POX08390 | beta-1, 6-glucanase                          | Y  | 3.508932166 | Down | NA                        | GH30           | act:ACLA_060250  | Metabolism//<br>Metabolism// Cellular<br>Processes | Lipid Metabolism// Glycan<br>Biosynthesis and<br>Metabolism// Transport and<br>Catabolism | Sphingolipid metabolism //<br>Other glycan degradation //<br>Lysosome |
| POX05968 | cellulose<br>monoxygenase                    | Y  | 1.717975307 | Down | cellulose<br>monoxygenase | AA9            | afm:AFUA_1G12560 | Unclassified                                       | Metabolism                                                                                | Others                                                                |
| POX09387 | chitinase                                    | Y  | 2.261724137 | Down | NA                        | GH18           | afm:AFUA_8G00700 | Metabolism                                         | Carbohydrate Metabolism                                                                   | Amino sugar and nucleotide<br>sugar metabolism                        |
| POX08903 | chitosanase                                  | Y  | 4.426723279 | Down | NA                        | GH75           | afm:AFUA_8G00930 | Metabolism                                         | Carbohydrate Metabolism                                                                   | Amino sugar and nucleotide<br>sugar metabolism                        |
| POX07820 | ecm33 domain-<br>containing protein          | Y  | 2.132719504 | Down | NA                        | NA             | NA               | NA                                                 | NA                                                                                        | NA                                                                    |

|          |                            |    |             |      |                            |      |                  |                                                |                                                                                                                    |                                                                          |
|----------|----------------------------|----|-------------|------|----------------------------|------|------------------|------------------------------------------------|--------------------------------------------------------------------------------------------------------------------|--------------------------------------------------------------------------|
| POX06689 | endo-beta-1, 4-galactanase | Y  | 1.420300361 | Down | endo-beta-1, 4-galactanase | GH53 | nfi:NFIA_017780  | Unclassified                                   | Metabolism                                                                                                         | Others                                                                   |
| POX09440 | hypothetical protein       | NA | 0.152110713 | Down | NA                         | NA   | zma:100501669    | Metabolism//<br>Metabolism                     | Carbohydrate Metabolism//<br>Energy Metabolism                                                                     | Glyoxylate and dicarboxylate<br>metabolism // Methane<br>metabolism      |
| POX05595 | hypothetical protein       | NA | 1.230071084 | Down | NA                         | NA   | pcs:Pc06g00090   | Metabolism                                     | Enzyme Families                                                                                                    | Peptidases                                                               |
| POX05569 | hypothetical protein       | Y  | 1.043918718 | Down | NA                         | NA   | pcs:Pc21g03510   | Metabolism                                     | Enzyme Families                                                                                                    | Peptidases                                                               |
| POX07147 | hypothetical protein       | NA | 1.013517804 | Down | NA                         | NA   | NA               | NA                                             | NA                                                                                                                 | NA                                                                       |
| POX05322 | hypothetical protein       | NA | 1.224700911 | Down | NA                         | NA   | NA               | NA                                             | NA                                                                                                                 | NA                                                                       |
| POX08831 | hypothetical protein       | Y  | 1.189973656 | Down | NA                         | NA   | NA               | NA                                             | NA                                                                                                                 | NA                                                                       |
| POX01123 | hypothetical protein       | NA | 1.435672029 | Down | NA                         | NA   | NA               | NA                                             | NA                                                                                                                 | NA                                                                       |
| POX08818 | hypothetical protein       | Y  | 1.597842124 | Down | NA                         | NA   | NA               | NA                                             | NA                                                                                                                 | NA                                                                       |
| POX09361 | hypothetical protein       | NA | 1.526587565 | Down | NA                         | NA   | NA               | NA                                             | NA                                                                                                                 | NA                                                                       |
| POX03840 | hypothetical protein       | NA | 2.070010447 | Down | NA                         | NA   | pcs:Pc13g05400   | Metabolism//<br>Metabolism                     | Lipid Metabolism// Enzyme<br>Families                                                                              | Arachidonic acid metabolism<br>// Peptidases                             |
| POX08878 | hypothetical protein       | NA | 1.634428618 | Down | NA                         | CE10 | NA               | NA                                             | NA                                                                                                                 | NA                                                                       |
| POX06904 | hypothetical protein       | Y  | 2.159574145 | Down | NA                         | NA   | NA               | NA                                             | NA                                                                                                                 | NA                                                                       |
| POX09222 | hypothetical protein       | Y  | 2.97009438  | Down | NA                         | NA   | NA               | NA                                             | NA                                                                                                                 | NA                                                                       |
| POX09299 | hypothetical protein       | Y  | 1.968835571 | Down | NA                         | NA   | NA               | NA                                             | NA                                                                                                                 | NA                                                                       |
| POX08849 | hypothetical protein       | Y  | 2.010643482 | Down | NA                         | NA   | afm:AFUA_7G00800 | Metabolism//<br>Metabolism// Human<br>Diseases | Metabolism of Cofactors and<br>Vitamins// Xenobiotics<br>Biodegradation and<br>Metabolism// Infectious<br>Diseases | Riboflavin metabolism //<br>Aminobenzoate degradation<br>// Tuberculosis |
| POX01929 | hypothetical protein       | Y  | 2.931151334 | Down | NA                         | NA   | afm:AFUA_5G01200 | Metabolism                                     | Enzyme Families                                                                                                    | Peptidases                                                               |
| POX09821 | hypothetical protein       | NA | 2.237949134 | Down | NA                         | NA   | NA               | NA                                             | NA                                                                                                                 | NA                                                                       |

|          |                               |    |             |      |                       |       |                |              |                                |                      |
|----------|-------------------------------|----|-------------|------|-----------------------|-------|----------------|--------------|--------------------------------|----------------------|
| POX09258 | hypothetical protein          | Y  | 3.162339876 | Down | NA                    | GH127 | mau:Micau_2566 | Unclassified | Poorly Characterized           | Function unknown     |
| POX05007 | hypothetical protein          | Y  | 3.10830225  | Down | NA                    | NA    | pcs:Pc21g03510 | Metabolism   | Enzyme Families                | Peptidases           |
| POX02885 | hypothetical protein          | NA | 2.593865666 | Down | NA                    | NA    | NA             | NA           | NA                             | NA                   |
| POX02880 | hypothetical protein          | NA | 1.503935719 | Down | NA                    | NA    | NA             | NA           | NA                             | NA                   |
| POX06146 | hypothetical protein          | Y  | 3.178895749 | Down | NA                    | NA    | NA             | NA           | NA                             | NA                   |
| POX06530 | hypothetical protein          | Y  | 2.13949975  | Down | NA                    | NA    | pcs:Pc06g00430 | Unclassified | Genetic Information Processing | Translation proteins |
| POX08770 | hypothetical protein          | NA | 3.417927461 | Down | NA                    | NA    | NA             | NA           | NA                             | NA                   |
| POX01524 | hypothetical protein          | NA | 6.996508084 | Down | expansin-like protein | CBM63 | NA             | NA           | NA                             | NA                   |
| POX01158 | SUN domain-containing protein | Y  | 1.644344603 | Down | NA                    | GH132 | NA             | NA           | NA                             | NA                   |

CAZy, Carbohydrate-Active Enzymes; GH, Glycoside hydrolase; CE, Carbohydrate esterase; GT, Glycosyl transferase; AA, Auxiliary activities; CBM, Carbohydrate-binding modules; CWDE, Plant cell wall degrading enzyme; KEGG, Kyoto Encyclopedia of Genes and Genomes (<http://www.genome.jp/kegg/>); NA, No annotation.
