# Supplementary material for: Comparative genomic, transcriptomic and secretomic profiling of Penicillium oxalicum HP7-1 and its cellulase and xylanase hyper-producing mutant EU2106, and identification of two novel regulatory genes of cellulase and xylanase gene expression
Source: PubMed Central journal article supplement (PMC5035457; doi:10.1186/s13068-016-0616-9), 2016-09-23
Supplement: 13068_2016_616_MOESM7_ESM.pdf [file 13068_2016_616_MOESM7_ESM.pdf]

**Additional file 7: Table S4. Eleven candidates with putative biological function in the first screening of transcription factors**

| Gene ID  | BlastP function analysis                                                                           | Candidate transcription factors of cellulase gene expression | Nucleoside mutation | Amino acid mutation | SNVs position | FPKM in HP7-1 | FPKM in EU2106 | Log <sub>2</sub> (EU2106/HP7-1) | Regulation in EU2106 | Probability |
|----------|----------------------------------------------------------------------------------------------------|--------------------------------------------------------------|---------------------|---------------------|---------------|---------------|----------------|---------------------------------|----------------------|-------------|
| POX00301 | glutamine synthase                                                                                 | No                                                           | G->A                | -                   | 1500_up       | 286.52        | 1135.43        | 1.98653                         | Up                   | 0.87933796  |
| POX06751 | putative alpha-glucosidase                                                                         | No                                                           | G<->A               | V<->I               | CDS           | 185.063       | 27.3333        | -2.7593                         | Down                 | 0.882434597 |
| POX06820 | Glycosyl phosphatidyl inositol (GPI) anchored serine-rich protein                                  | No                                                           | G->T                | -                   | 1500_up       | 7952.22       | 1535.89        | -2.3723                         | Down                 | 0.903897491 |
| POX07291 | putative mitochondrial phosphate transporter Pic2                                                  | Yes <sup>a</sup>                                             | G->A                | -                   | 200_down      | 83.6433       | 759.52         | 3.18277                         | Up                   | 0.920181527 |
| POX09827 | hypothetical protein (only 35 amino acids)                                                         | No                                                           | C->G                | -                   | 1500_up       | 39.5267       | 162.437        | 2.03898                         | Up                   | 0.847962271 |
| POX01960 | Known transcription factor ClrB ortholog of cellulase gene expression                              | Yes                                                          | G<->A               | S<->N               | CDS           | NA            | NA             | NA                              | NA                   | NA          |
| POX03199 | CCR4-Not complex component, Not1                                                                   | No <sup>b</sup>                                              | G<->A               | R<->H               | CDS           | NA            | NA             | NA                              | NA                   | NA          |
| POX08522 | Forkhead transcription factor                                                                      | Yes <sup>c</sup>                                             | C<->T               | H<->Y               | CDS           | NA            | NA             | NA                              | NA                   | NA          |
| POX02484 | GAL4-like Zn <sub>2</sub> Cys <sub>6</sub> binuclear cluster DNA binding domain and Fungal_Trans_2 | Yes <sup>d</sup>                                             | -                   | -                   | -             | 99.75         | 28.3433        | -1.8153                         | Down                 | 0.810375512 |
| POX03873 | GAL4-like Zn <sub>2</sub> Cys <sub>6</sub> binuclear cluster DNA binding domain                    | No <sup>d</sup>                                              | -                   | -                   | -             | 161.82        | 44.4467        | -1.8642                         | Down                 | 0.836803702 |
| POX07938 | GAL4-like Zn <sub>2</sub> Cys <sub>6</sub> binuclear cluster DNA binding domain                    | No <sup>d</sup>                                              | -                   | -                   | -             | 13.6367       | 201.973        | 3.8886                          | Up                   | 0.90560598  |

1500\_up, 1500-bp upstream of start codon ATG; 200\_down, 200-bp downstream of stop codon TAA, TGA or TAG; CDS, coding DNA sequence; CAZy, Carbohydrate-Active Enzymes; CWDE, Plant cell wall degrading enzyme; NA, no .

<sup>a</sup> Mitochondrial phosphate transporter Pic is a mitochondrial solute carrier protein, delivering phosphate, a key substrate of oxidative phosphorylation<sup>1</sup>.

<sup>b</sup> Not1, CCR4-Not complex component, is essential for yeast viability as a member of CCR4-Not complex by regulating transcription expression of the interrelated genes<sup>2</sup>.

<sup>c</sup> The forkhead box binding nucleosomal DNA, participates a wide variety of cellular processes including cell cycle regulation, cell death control, pre-mRNA processing and

morphogenesis in yeast and filamentous fungi, as well as in mammals<sup>3</sup>.

<sup>d</sup> Generally, the important transcription factors contains two domains GAL4-like Zn<sub>2</sub>Cys<sub>6</sub> binuclear cluster DNA binding domain and Fungal\_Trans\_2/Fungal\_TF\_MHR. The Fungal\_Trans\_2/Fungal\_TF\_MHR domain is required for the protein function<sup>4</sup>.

**Reference:**

1. Seiferta, E. L., Ligetib, E., Mayrc, J. A., Sondheimerd, N., Hajnóczkya, G. The mitochondrial phosphate carrier: role in oxidative metabolism, calcium handling and mitochondrial disease. *Biochem. Bioph. Res. Co.* 464, 369-375 (2015).
2. Maillet, L. & Collart, M. A. Interaction between Not1p, a component of the Ccr4-Not complex, a global regulator of transcription, and Dhh1p, a putative RNA helicase. *J. Biol. Chem.* 277, 2835-2842 (2002).
3. Murakami, H., Aiba, H., Nakanishi, M. & Tonami, Y.M. Regulation of yeast forkhead transcription factors and FoxM1 by cyclin-dependent and polo-like kinases. *Cell Cycle* 9, 3253-3262 (2010).
4. MacPherson, S., Larochelle, M. & Turcotte, B. A fungal family of transcriptional regulators: the zinc cluster proteins. *Microbiol. Mol. Biol. Rev.* 70, 583-604 (2014).
