# Supplementary material for: Comparative genomic, transcriptomic and secretomic profiling of Penicillium oxalicum HP7-1 and its cellulase and xylanase hyper-producing mutant EU2106, and identification of two novel regulatory genes of cellulase and xylanase gene expression
Source: PubMed Central journal article supplement (PMC5035457; doi:10.1186/s13068-016-0616-9), 2016-09-23

**A**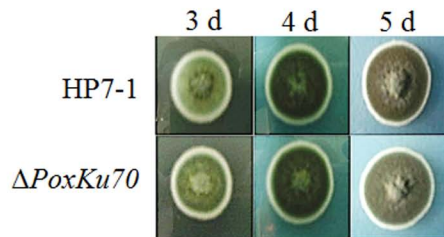**B**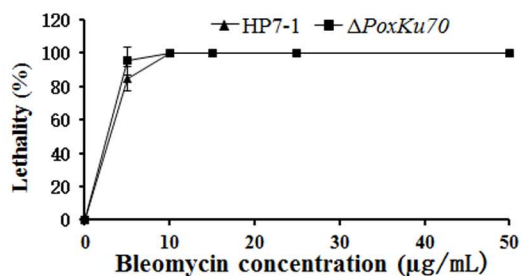**E**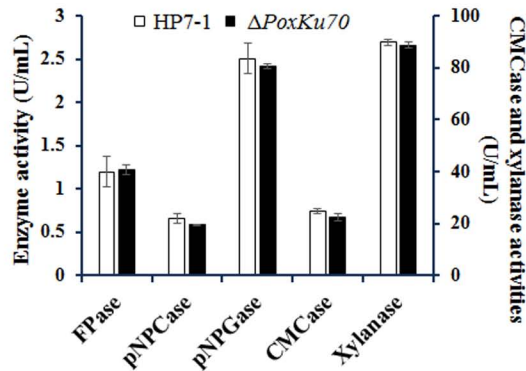**C**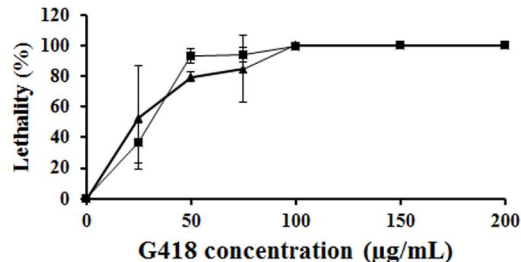**D**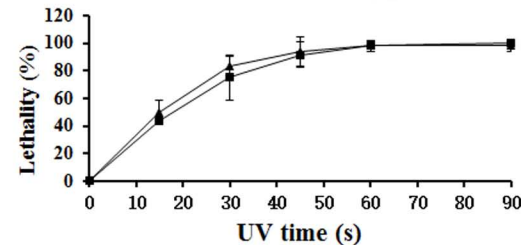

Supplement: 13068_2016_616_MOESM8_ESM.pdf [file 13068_2016_616_MOESM8_ESM.pdf]
