# Supplementary material for: Comparative genomic, transcriptomic and secretomic profiling of Penicillium oxalicum HP7-1 and its cellulase and xylanase hyper-producing mutant EU2106, and identification of two novel regulatory genes of cellulase and xylanase gene expression
Source: PubMed Central journal article supplement (PMC5035457; doi:10.1186/s13068-016-0616-9), 2016-09-23
Supplement: 13068_2016_616_MOESM11_ESM.pdf [file 13068_2016_616_MOESM11_ESM.pdf]

**Additional file 11: Table S5. Primers used in this study**

| <b>Primer name</b>                                           | <b>Sequence (5'-3')</b>                           |
|--------------------------------------------------------------|---------------------------------------------------|
| <b>Primers used for the construction of deletion mutants</b> |                                                   |
| PoxClrB_Left_F                                               | GGAATTCGATAGATCGCGGACCCGAGG                       |
| PoxClrB_Left_R                                               | GTTTAGAGGTAATCCTTCTTTCTAGAAATGACTGTACGGTAGCACC    |
| PoxClrB_nest_F                                               | GAACAGACTGGTGGCGTAGAA                             |
| PoxClrB_nest_R                                               | TGCGGCGACATAGCGTAGT                               |
| PoxClrB_Right_F                                              | CTTCAATATCATCTTCTGTCGACGGGATCTTGAACCTTCTGTTG      |
| PoxClrB_Right_R                                              | CCCAAGCTTGAACGAACAACGCCATTG                       |
| POX02484_Left_F                                              | ATCTGATTACTCCCTGGATGCGAAC                         |
| POX02484_Left_R                                              | TTTAGAGGTAATCCTTCTTTCTAGACTTGATTATGAGAGCCAATGCTCG |
| POX02484_Nest_F                                              | TATCTCTTACGAAATGATTGGTCTT                         |
| POX02484_Nest_R                                              | CAAGGGTGGATTGTCCTCTAA                             |
| POX02484_Right_F                                             | TCCTTCAATATCATCTTCTGTCGACATTTCTACAGTTTTGAGCGATCG  |
| POX02484_Right_R                                             | GATAGCGAAACAGTAAAGGCG                             |
| POX07291_Left_F                                              | ATGGACGGGAGATGTTTCA                               |
| POX07291_Left_R                                              | GGTAATCCTTCTTTCTAGACTTGACTTGTTAATCGTTCCAGG        |
| POX07291_Nest_F                                              | CCGAACGCCAAAGGAAAGA                               |
| POX07291_Nest_R                                              | CTCAAGGCCAACTGACCCATCTGGAGTTGCGGGTGTGGAAT         |
| POX07291_Right_F                                             | AATATCATCTTCTGTCGACATAATAGTGCATCGTTCCAGG          |
| POX07291_Right_R                                             | CGCCGACACAGCCCCTCTA                               |
| POX08522_Left_F                                              | GGGACGATGTATGAGGTTGGGA                            |
| POX08522_Left_R                                              | GGTAATCCTTCTTTCTAGATATGTGCAAGGATCGAGAACG          |
| POX08522_Nest_F                                              | AAAAGTTGGAGATGCGGAAGTTGGT                         |
| POX08522_Nest_R                                              | GACATAGGACCTTTGGTTGACTG                           |

|                         |                                                  |
|-------------------------|--------------------------------------------------|
| POX08522_Right_F        | CAATATCATCTTCTGTCGACCGGGGGTTCCTTGTTCCCTCCCTCCTCC |
| POX08522_Right_R        | CAGGGTTATGAGAAGGTGAGTT                           |
| PoxClrB_confirm_F       | AAGTCATCGTGTGGCTGGAT                             |
| PoxClrB_confirm_R       | CGGTCGGATCGTTGAGGAA                              |
| PoxClrBleft_confirm-F   | GTCACACTCCACGCAACTG                              |
| PoxClrBleft_confirm-R   | TCGCCTTCTATCGCCTTCTT                             |
| PoxClrBright_confirm-F  | GATCCGCCTGGACGACTAA                              |
| PoxClrBright_confirm-F  | AATCACACCTGCTAGGAATGC                            |
| POX02484_confirm-F      | CGAGATTGATGTGAAGACCGAG                           |
| POX02484_confirm-R      | GATAAATCCGGGCAGCGAG                              |
| POX02484left_confirm-F  | CGGCTGGTACTAGAGATCTGATCA                         |
| POX02484left_confirm-R  | ACCTCGAAATCATTCTACTAAG                           |
| POX02484right_confirm-F | ACCAGTTGCCTAAATGAACCATC                          |
| POX02484right_confirm-F | TCGGCATGTTGACAAGATGATGAGA                        |
| POX07291_confirm_F      | GAACGCCGACCGAAAGTGT                              |
| POX07291_confirm_R      | AGGACTACGGCGATGAATGG                             |
| POX07291left_confirm-F  | ATGGACGGGAGATGTTTCA                              |
| POX07291left_confirm-R  | GCCCTGGGTTCGCAAAGATA                             |
| POX07291right_confirm-F | AATAATGTCCTCGTTCCTGTCTGC                         |
| POX07291right_confirm-F | CGCCGACACAGCCCCTCTA                              |
| POX08522_confirm_F      | CCATTGCTCCCTTCATCCA                              |
| POX08522_confirm_R      | GCTTCATCTGCGGTATCTTCC                            |
| POX08522left_confirm-F  | GGGACGATGTATGAGGTTGGGA                           |
| POX08522left_confirm-R  | GTGAATGCTCCGTAACACCCAAT                          |
| POX08522right_confirm-F | CGCTACTGCTTACAAGTGGGCTGAT                        |

|                                 |                           |
|---------------------------------|---------------------------|
| POX08522right_confirm-F         | CAGGGTTATGAGAAGGTGAGTT    |
| G418_F                          | TCTAGAAAGAAGGATTACC       |
| G418_R                          | GTCGACAGAAGATGATATT       |
| <b>Primers used for qRT-PCR</b> |                           |
| Actin-F                         | CTCCATCCAGGCCGTTCTG       |
| Actin-R                         | CATGAGGTAGTCGGTCAAGTCAC   |
| POX05587-F                      | GTACTIONGCGATCCTGATGGG    |
| POX05587-R                      | CCACGGTGAAGGGAGACTTG      |
| POX04786-F                      | TACTACGCTTCCGAGGTTTCAGAG  |
| POX04786-R                      | GTGTCCAGCAAACGAAGG        |
| POX02490-F                      | TGAAACCCACCCACCACTC       |
| POX02490-R                      | GTAGCATCGTCAGGGCACA       |
| POX01166-F                      | CGATACTACGGCAACATCATCAC   |
| POX01166-R                      | AGGCACCAGTCCACGAGTTT      |
| POX07535-F                      | CGACTACTTGACCCAGCACCA     |
| POX07535-R                      | CTAGTACACGCTCGCAGACCA     |
| POX06983-F                      | GATCAACCACCAGGGTCTCAA     |
| POX06983-R                      | CAAACAACAGCCACGGAGTAAG    |
| POX06147-F                      | CACAATTACGCTCGCTGGAA      |
| POX06147-R                      | GGCTCGTTCATCACACCAA       |
| POX01896-F                      | GGGCAAGGATACTCGGGAAG      |
| POX01896-R                      | GGCAGTTGTTGTTGACGATGTT    |
| POX02740-F                      | G TTCAGTTCCTGATGGAAAGATTG |
| POX02740-R                      | CATAACCGCCTGCTTGAGTG      |
| POX04137-F                      | CGGCACTCTCGGCAAGGATTA     |

|                                                                          |                           |
|--------------------------------------------------------------------------|---------------------------|
| POX04137-R                                                               | CATCAGGAAGGGGACACGGAA     |
| POX05571-F                                                               | AACCTGGAAGAACGGCACC       |
| POX05571-R                                                               | CCTTGTCACAGTCATCGGAGC     |
| POX06835-F                                                               | GTGCTGGATGGGAACAGGA       |
| POX06835-R                                                               | TACGAACGCCGAGAGGAGA       |
| POX07963-F                                                               | ATCTTTTATGTGCTCCTACAACCAG |
| POX07963-R                                                               | GCCAGTCACTCATCACGAACC     |
| POX08882-F                                                               | TCCAGGAAGCCGAGAAGAACC     |
| POX08882-R                                                               | AGCACCGATGACACGAACGC      |
| POX08484-F                                                               | ACAAGCACACGCAGGTCAA       |
| POX08484-R                                                               | CGCTGAAGTGGTTGGCAGT       |
| POX06783-F                                                               | TGAGCCCAGGACCATCAACTT     |
| POX06783-R                                                               | TACCCTTGCTTTTGCCGCC       |
| POX00063-F                                                               | TACCTCCCCATCGCCTTT        |
| POX00063-R                                                               | CTTGGCACCGTAGGACTGAAC     |
| POX05916-F                                                               | ATCGAGAATCAGGGCACAAAG     |
| POX05916-R                                                               | ATCCGCCAACGAAGGTGT        |
| POX02484-F                                                               | GCCCTTTTATGTCCCCTTACGA    |
| POX02484-R                                                               | CAAACCATCCTTCATCACCAA     |
| POX08522-F                                                               | CGGATCATGCTCACAGTACCTT    |
| POX08522-R                                                               | CAGGGGATGAGTGTTGCTTTC     |
| PoxClrB-F                                                                | CTTCCAGGCGTCTCTCGTTC      |
| PoxClrB-R                                                                | CGCTTGCTGGCTTCGTAAA       |
| <b>Primers used for amplifying the probes for Southern hybridization</b> |                           |
| PoxClrB-F                                                                | TGACGGGAGTGGATGGGC        |

|            |                         |
|------------|-------------------------|
| PoxClrB-R  | AACCGGATGCAAAGGATG      |
| POX02484-F | ATTTCTACAGTTTTGAGCGATCG |
| POX02484-R | GATAGCGAAACAGTAAAGGCG   |
| POX07291-F | CCGAACGCCAAAGGAAAG      |
| POX07291-R | GGTCAGGACAAAAGAACGATG   |
| POX08522-F | GCAGGCAACCCTTCTAAC      |
| POX08522-R | CGGCAGGGTCTGTATTG       |
